# Supplementary material for: CNV-association meta-analysis in 191,161 European adults reveals new loci associated with anthropometric traits
Source: PubMed Central journal article supplement (PMC5622064; doi:10.1038/s41467-017-00556-x), 2017-09-29
Supplement: 41467_2017_556_MOESM1_ESM.pdf [file 41467_2017_556_MOESM1_ESM.pdf]

## **Description of Supplementary Files**

File Name: Supplementary Information

Description: Supplementary Figures, Supplementary Tables, Supplementary Notes and Supplementary References

File Name: Supplementary Data 1

Description: All assessed probes with its frequency, effect size and P-value for BMI, weight, height and waist-to-hip ratio.

File Name: Peer Review File

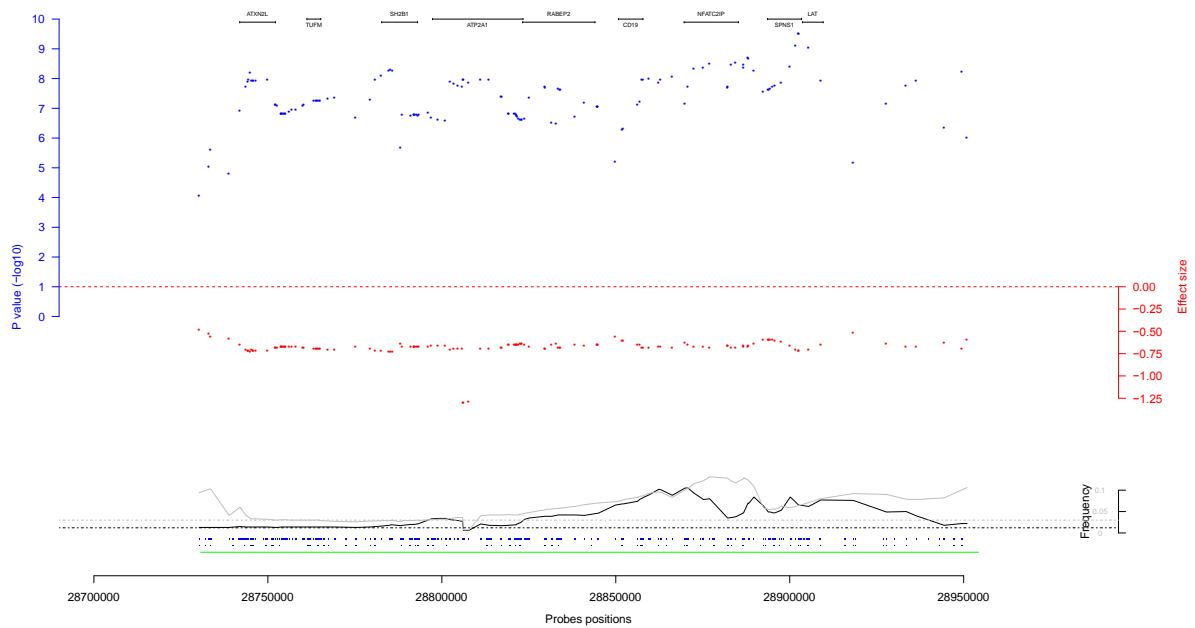

**Supplementary Figure 1:** Local Manhattan plot on the 16p11.2 220kb rearrangement. The blue dots correspond to the probes p-values of the association with the Weight. The red dots are the corresponding effect sizes. At the bottom the black and grey lines are the deletions and duplications frequencies. Finally, the dots at the bottom are the probes positions for the GIANT cohorts above and the UK Biobank below. The green line represents the known syndromic CNV in the region. Positions of the genes are set at the top of the plot.

**A**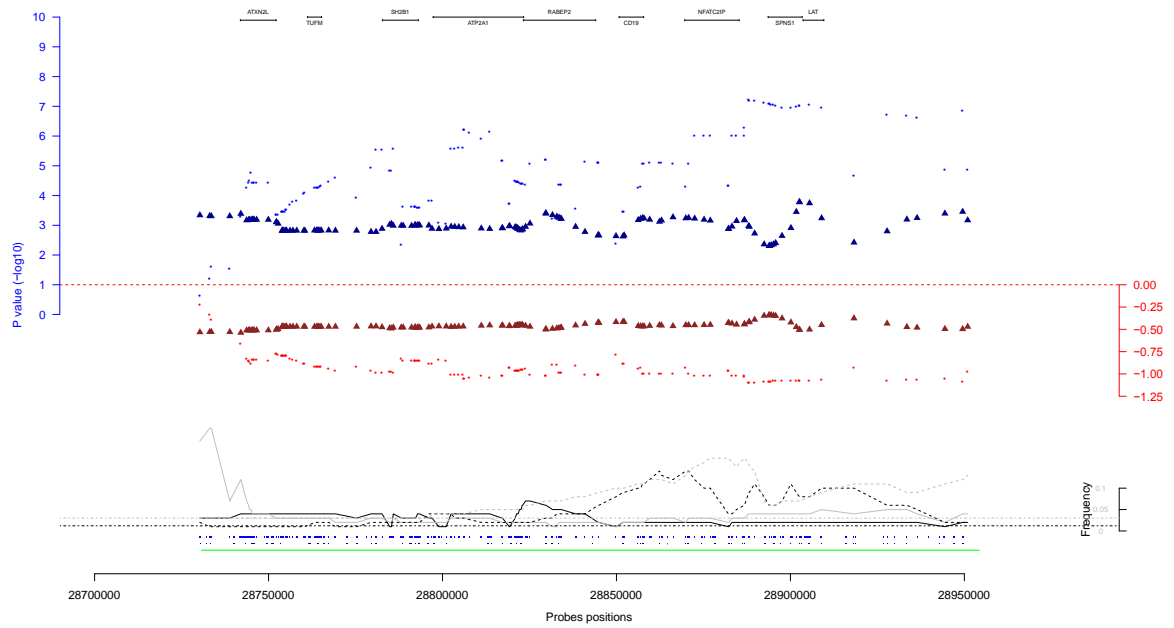**B**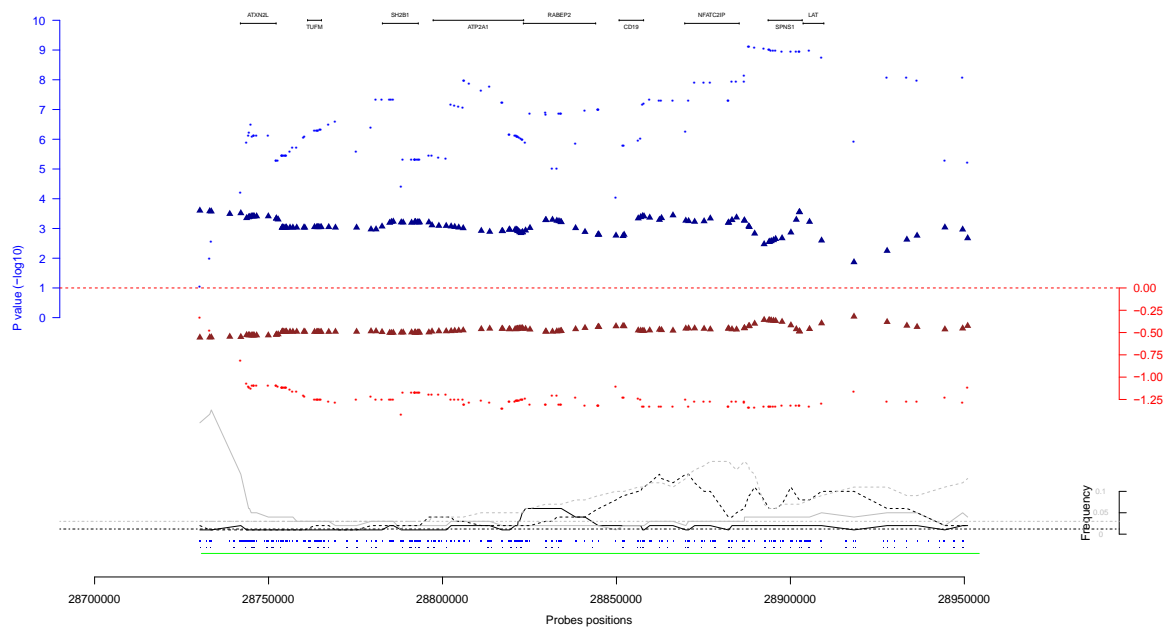

**Supplementary Figure 2: (A)** Local Manhattan plot on the 16p11.2 220kb rearrangement, separately for the GIANT data (dot) and the UKBB data (triangles). The blue dots/triangles correspond to the probes p-values of the association with the BMI. The red dots/triangles are the corresponding effect sizes. At the bottom the black and grey lines are the deletions and duplications frequencies. The plain one corresponds to the GIANT data while the dash

one to the UKBB. Finally, the dots at the bottom are the probes positions for the GIANT cohorts above and the UK Biobank below. The green line represents the known syndromic CNV in the region. Positions of the genes are set at the top of the plot. **(B)** Local Manhattan plot on the 16p11.2 220kb rearrangement, separately for the GIANT data (dot) and the UKBB data (triangles). The blue dots/triangles correspond to the probes p-values of the association with the Weight. The red dots/triangles are the corresponding effect sizes. At the bottom the black and grey lines are the deletions and duplications frequencies. The plain one corresponds to the GIANT data while the dash one to the UKBB. Finally, the dots at the bottom are the probes positions for the GIANT cohorts above and the UK Biobank below. The green line represents the known syndromic CNV in the region. Positions of the genes are set at the top of the plot.

**A**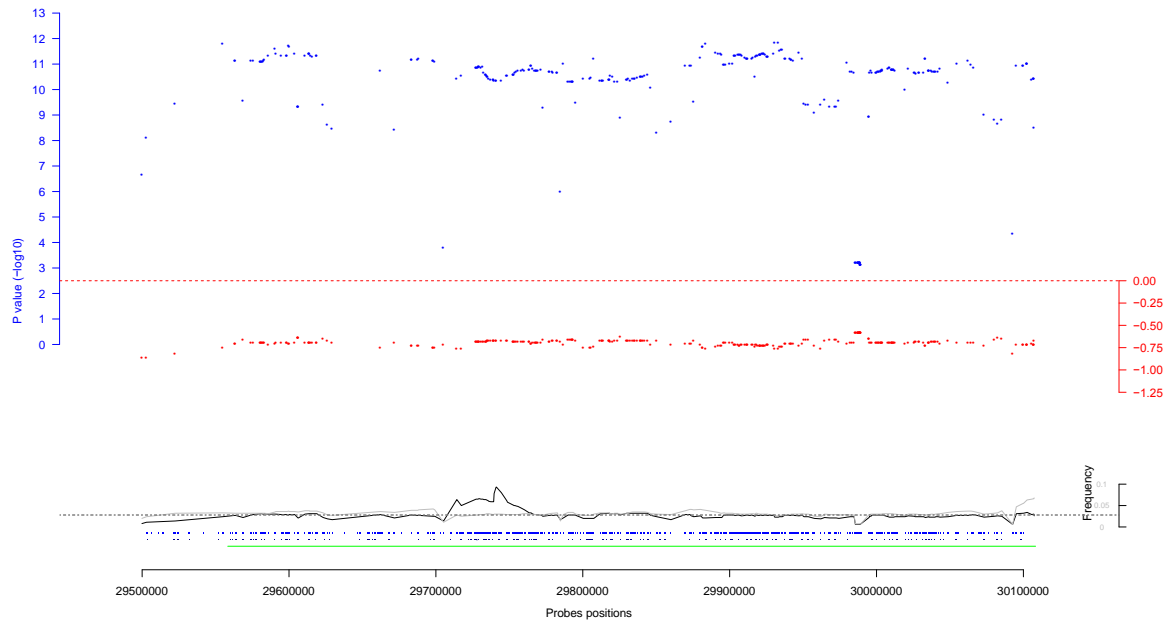**B**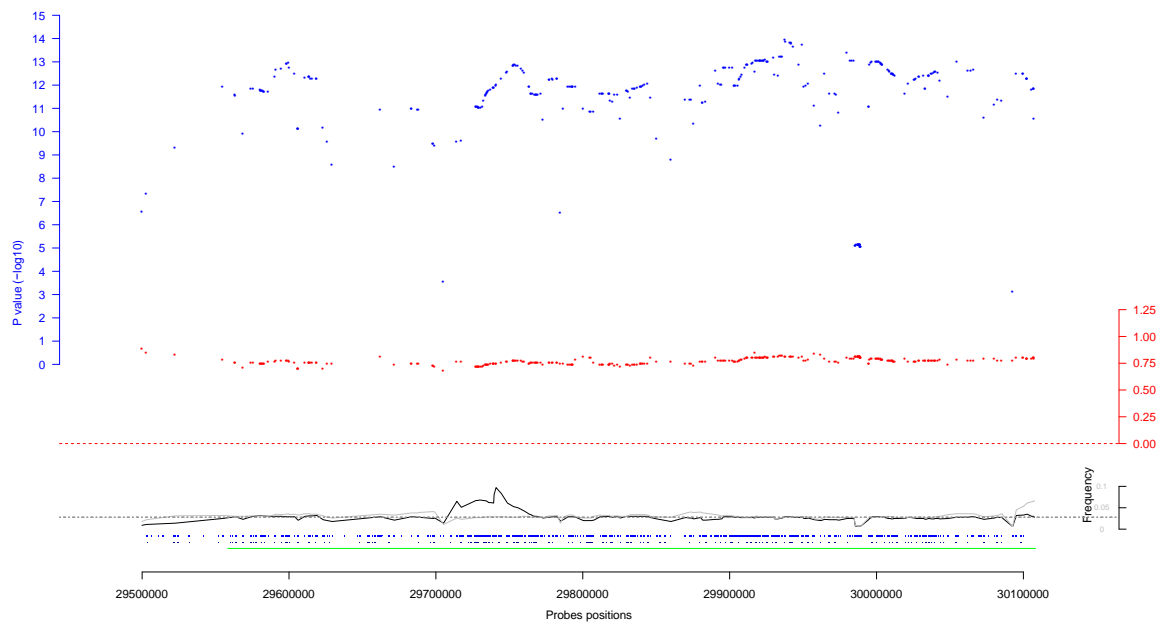

**C**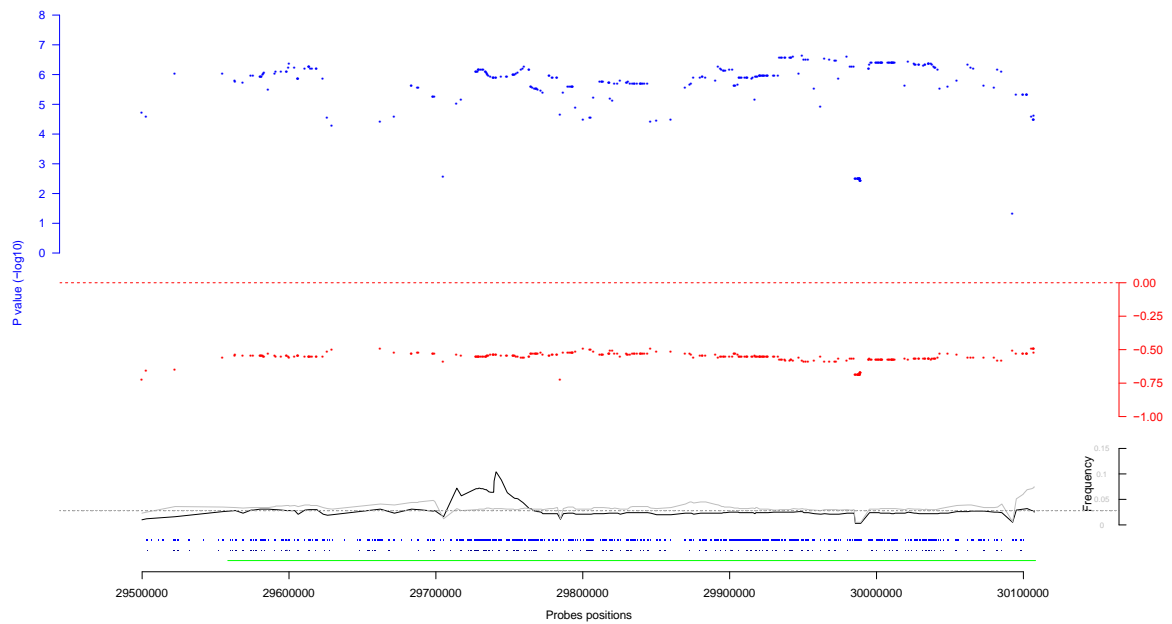

**Supplementary Figure 3: (A)** Local Manhattan plot on the 16p11.2 600kb rearrangement. The blue dots correspond to the probes p-values of the association with the BMI. The red dots are the corresponding effect sizes. At the bottom the black and grey lines are the deletions and duplications frequencies. Finally, the dots at the bottom are the probes positions for the GIANT cohorts above and the UK Biobank below. **(B)** Local Manhattan plot on the 16p11.2 600kb rearrangement. The blue dots correspond to the probes p-values of the association with the Height. The red dots are the corresponding effect sizes. At the bottom the black and grey lines are the deletions and duplications frequencies. Finally, the dots at the bottom are the probes positions for the GIANT cohorts above and the UK Biobank below. The green line represents the known syndromic CNV in the region. **(C)** Local Manhattan plot on the 16p11.2 600kb rearrangement. The blue dots correspond to the probes p-values of the association with the Waist-Hip ratio. The red dots are the corresponding effect sizes. At the bottom the black and grey lines are the deletions and duplications frequencies. Finally, the dots at the bottom are the probes positions for the GIANT cohorts above and the UK Biobank below. The green line represents the known syndromic CNV in the region.

**A**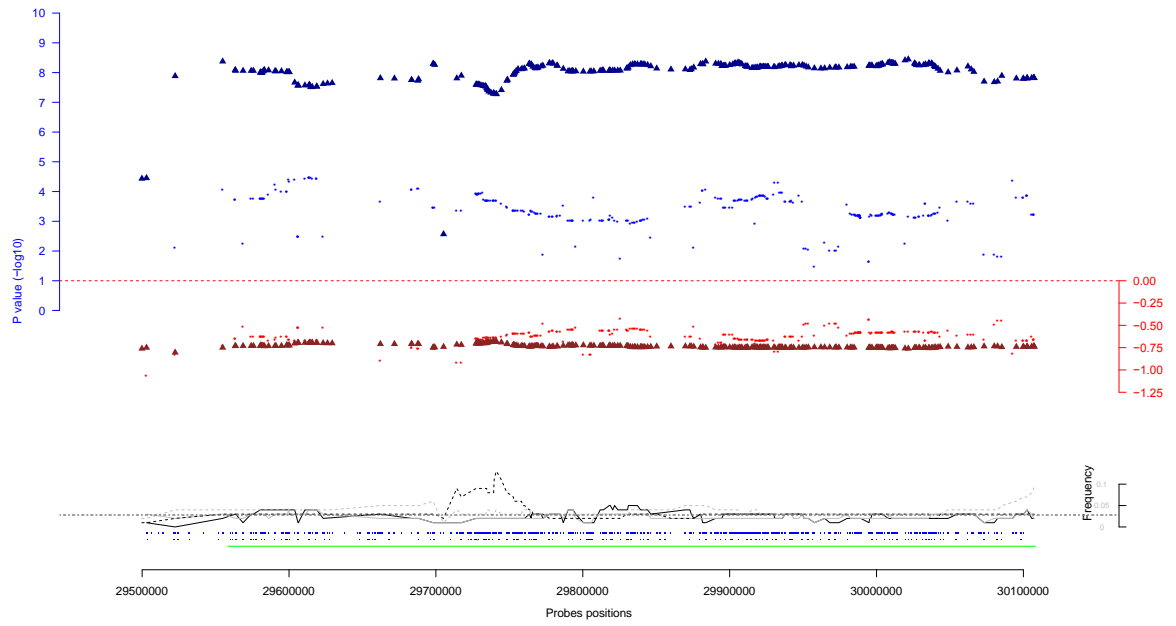**B**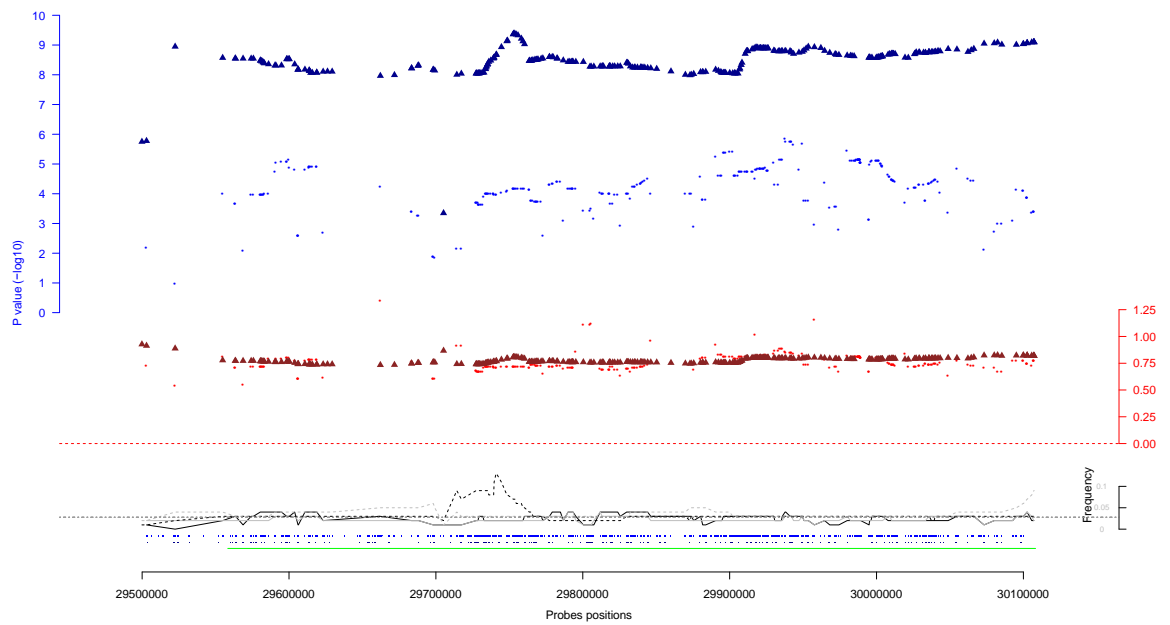

**C**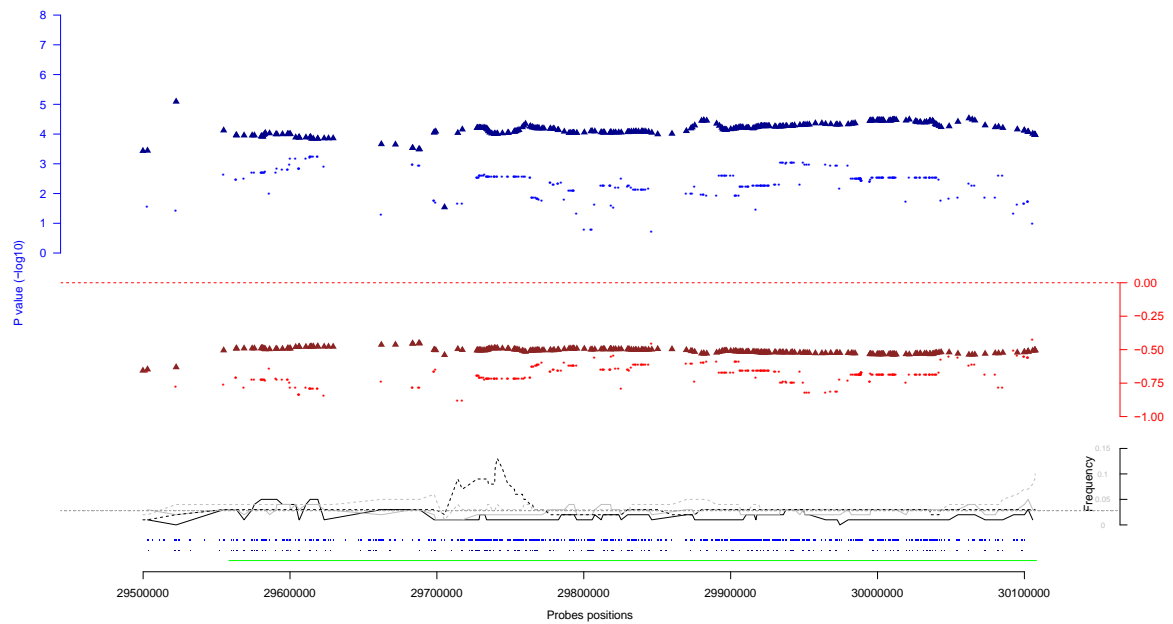

**Supplementary Figure 4: (A)** Local Manhattan plot on the 16p11.2 600kb rearrangement, separately for the GIANT data (dot) and the UKBB data (triangles). The blue dots/triangles correspond to the probes p-values of the association with the BMI. The red dots/triangles are the corresponding effect sizes. At the bottom the black and grey lines are the deletions and duplications frequencies. The plain one corresponds to the GIANT data while the dash one to the UKBB. Finally, the dots at the bottom are the probes positions for the GIANT cohorts above and the UK Biobank below. The green line represents the known syndromic CNV in the region. **(B)** Local Manhattan plot on the 16p11.2 600kb rearrangement, separately for the GIANT data (dot) and the UKBB data (triangles). The blue dots/triangles correspond to the probes p-values of the association with the Height. The red dots/triangles are the corresponding effect sizes. At the bottom the black and grey lines are the deletions and duplications frequencies. The plain one corresponds to the GIANT data while the dash one to the UKBB. Finally, the dots at the bottom are the probes positions for the GIANT cohorts above and the UK Biobank below. The green line represents the known syndromic CNV in the region. **(C)** Local Manhattan plot on the 16p11.2 600kb rearrangement, separately for the GIANT data (dot) and the UKBB data (triangles). The blue dots/triangles correspond to the probes p-values of the association with the Waist-Hip ratio. The red dots/triangles are the corresponding effect sizes. At the bottom the black and grey lines are the deletions and duplications frequencies. The plain one corresponds to the GIANT data while the dash one to the UKBB. Finally, the dots at the bottom are the probes positions for the GIANT cohorts above and the UK Biobank below. The green line represents the known syndromic CNV in the region.



**A**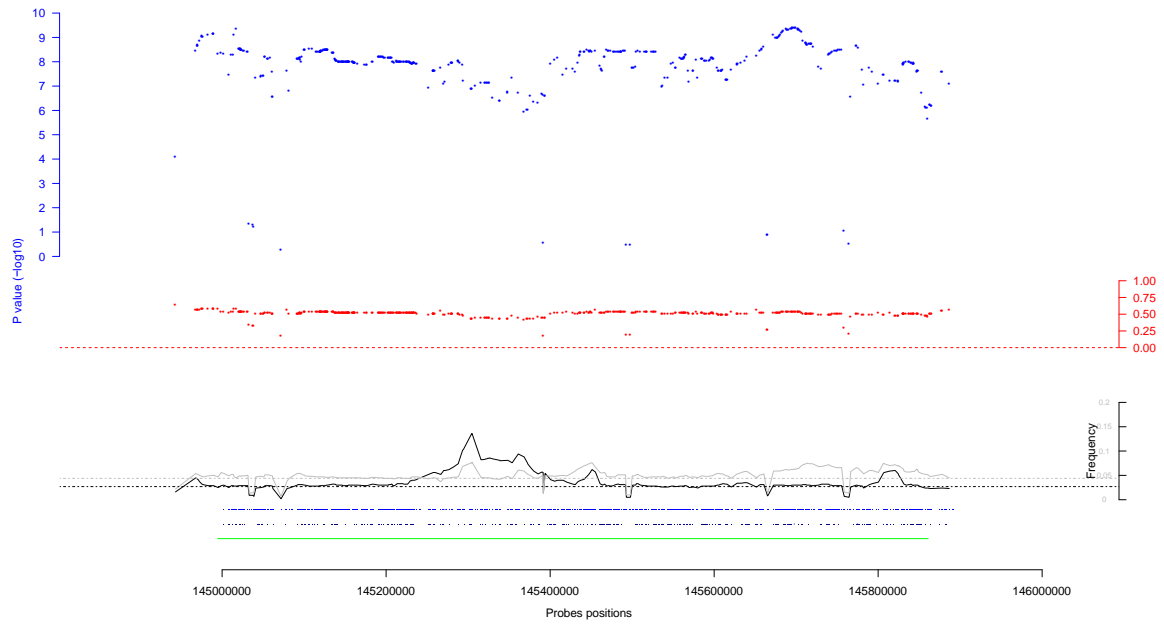**B**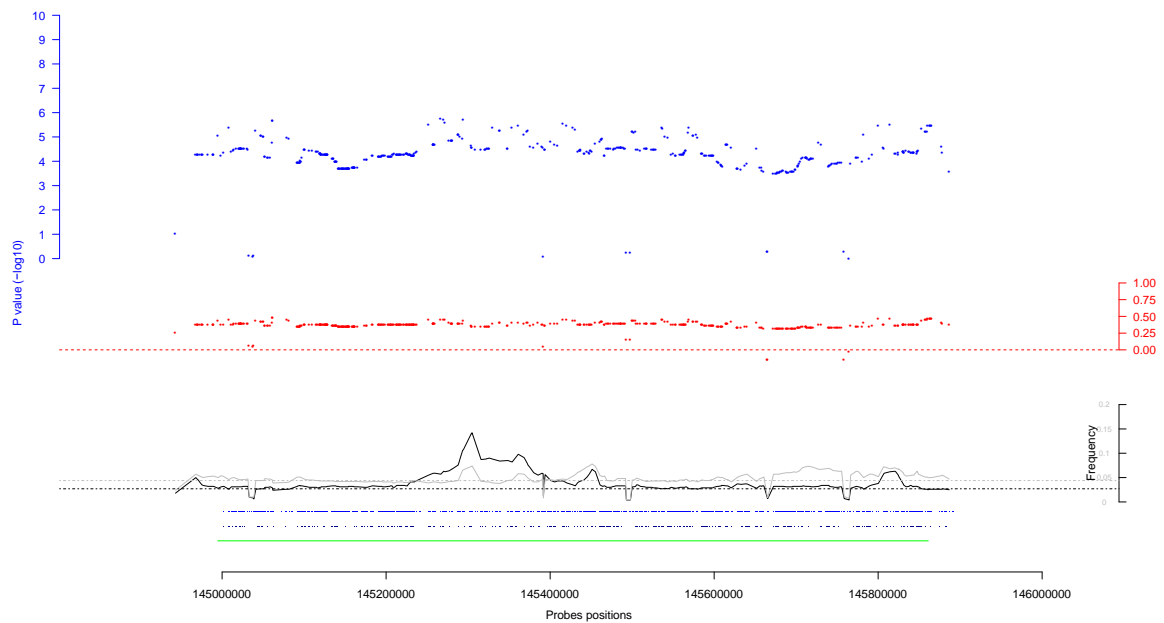

**Supplementary Figure 5: (A)** Local Manhattan plot on the 1p36 rearrangement. The blue dots correspond to the probes p-values of the association with the Height. The red dots are the corresponding effect sizes. At the bottom the black and grey lines are the deletions and duplications frequencies. Finally, the dots at the bottom are the probes positions for the GIANT cohorts above and the UK Biobank below. The green line represents the known

syndromic CNV in the region. Positions of the genes are set at the top of the plot. **(B)** Local Manhattan plot on the 1p36 rearrangement. The blue dots correspond to the probes p-values of the association with the Weight. The red dots are the corresponding effect sizes. At the bottom the black and grey lines are the deletions and duplications frequencies. Finally, the dots at the bottom are the probes positions for the GIANT cohorts above and the UK Biobank below. Positions of the genes are set at the top of the plot.

**A**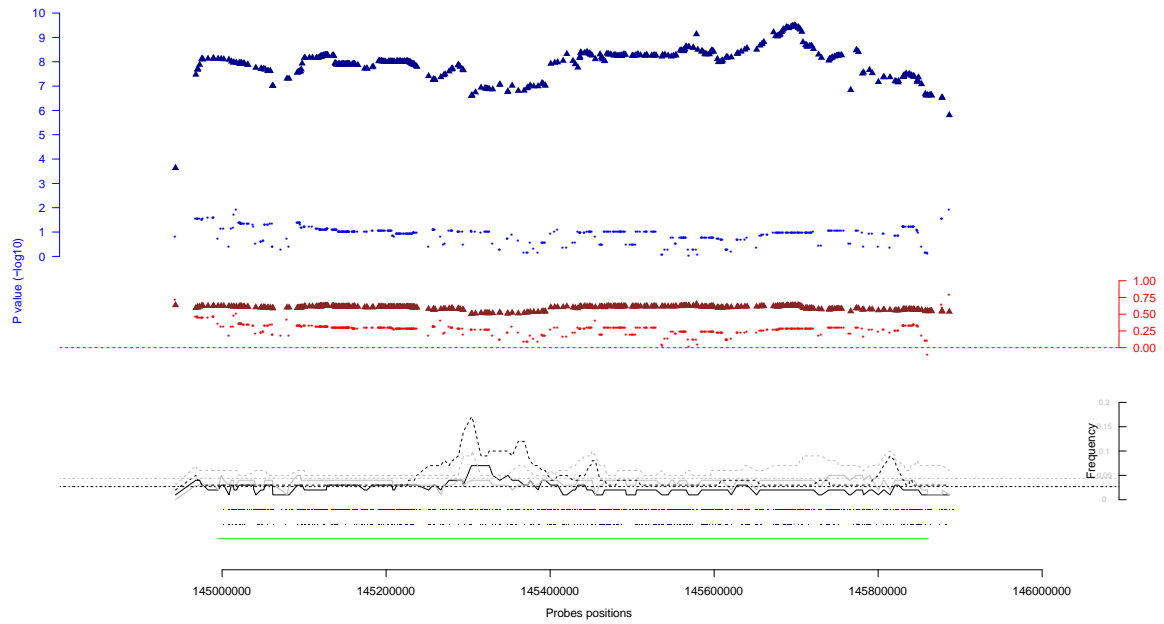**B**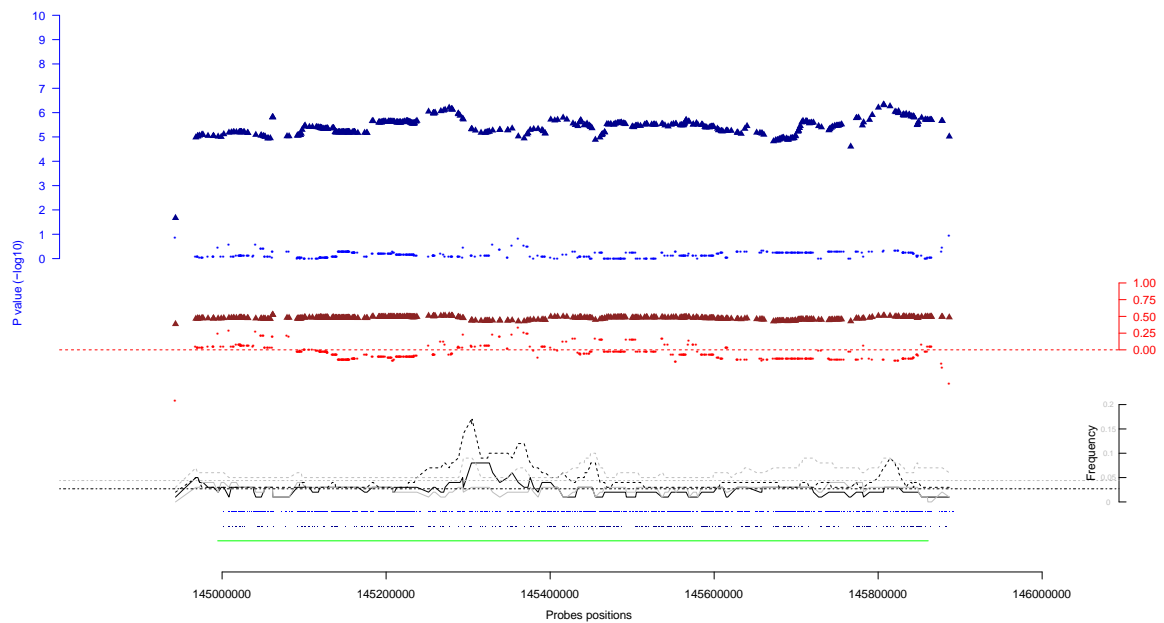

**Supplementary Figure 6: (A)** Local Manhattan plot on the 1p36 rearrangement, separately for the GIANT data (dot) and the UKBB data (triangles). The blue dots/triangles correspond to the probes p-values of the association with the Height. The red dots/triangles are the corresponding effect sizes. At the bottom the black and grey lines are the deletions and duplications frequencies. The plain one corresponds to the GIANT data while the dash one

to the UKBB. Finally, the dots at the bottom are the probes positions for the GIANT cohorts above and the UK Biobank below. The green line represents the known syndromic CNV in the region. Positions of the genes are set at the top of the plot. **(B)** Local Manhattan plot on the 1p36 rearrangement, separately for the GIANT data (dot) and the UKBB data (triangles). The blue dots/triangles correspond to the probes p-values of the association with the Weight. The red dots/triangles are the corresponding effect sizes. At the bottom the black and grey lines are the deletions and duplications frequencies. The plain one corresponds to the GIANT data while the dash one to the UKBB. Finally, the dots at the bottom are the probes positions for the GIANT cohorts above and the UK Biobank below. The green line represents the known syndromic CNV in the region. Positions of the genes are set at the top of the plot.

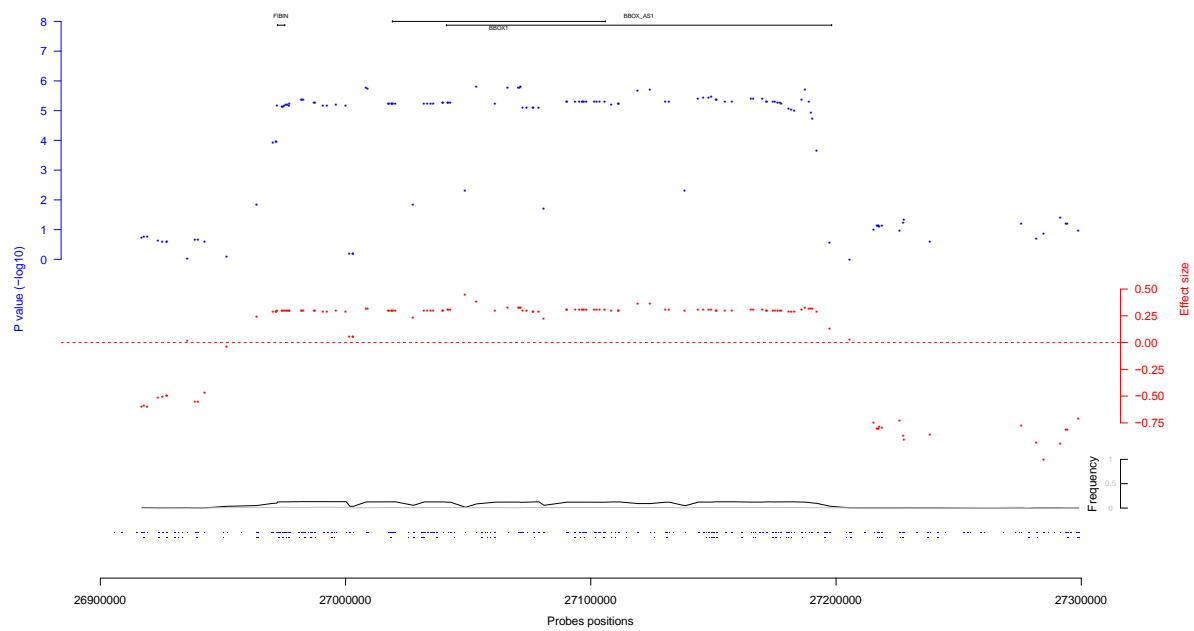

**Supplementary Figure 7:** Local Manhattan plot on the rearrangement near BBOX1 and Fibrin. The blue dots correspond to the probes p-values of the association with the Height. The red dots are the corresponding effect sizes. At the bottom the black and grey lines are the deletions and duplications frequencies. Finally, the dots at the bottom are the probes positions for the GIANT cohorts above and the UK Biobank below. Positions of the genes are set at the top of the plot.

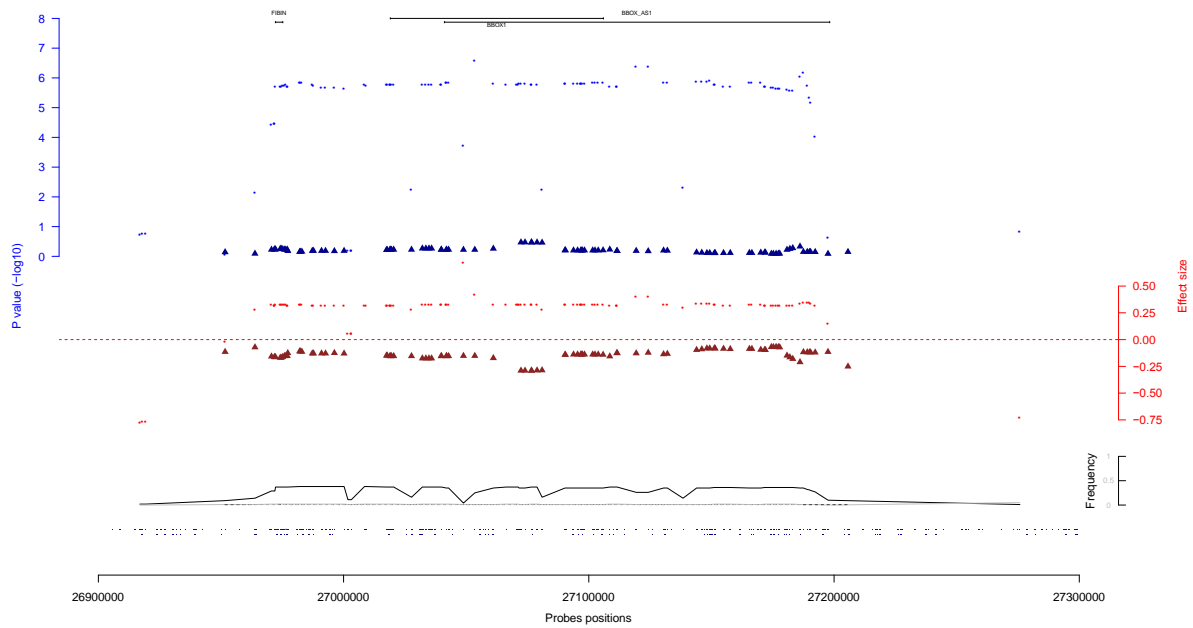

**Supplementary Figure 8:** Local Manhattan plot on the rearrangement near BBOX1 and Fibrin, separately for the GIANT data (dot) and the UKBB data (triangles). The blue dots/triangles correspond to the probes p-values of the association with the Height. The red dots/triangles are the corresponding effect sizes. At the bottom the black and grey lines are the deletions and duplications frequencies. The plain one corresponds to the GIANT data while the dash one to the UKBB. Finally, the dots at the bottom are the probes positions for the GIANT cohorts above and the UK Biobank below. Positions of the genes are set at the top of the plot.

**A**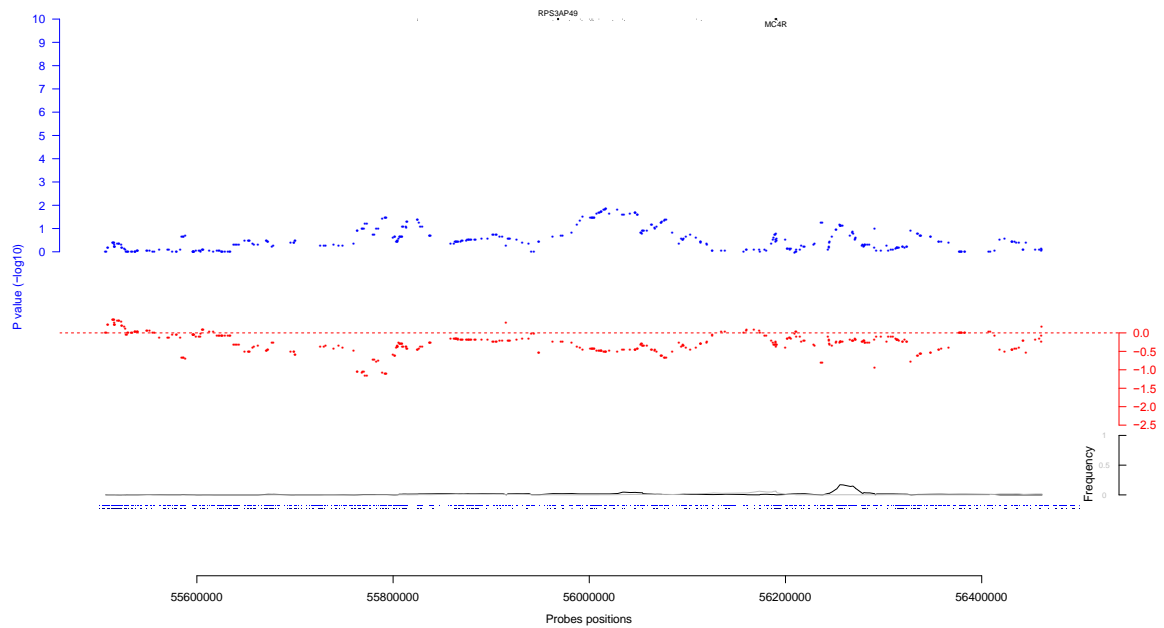**B**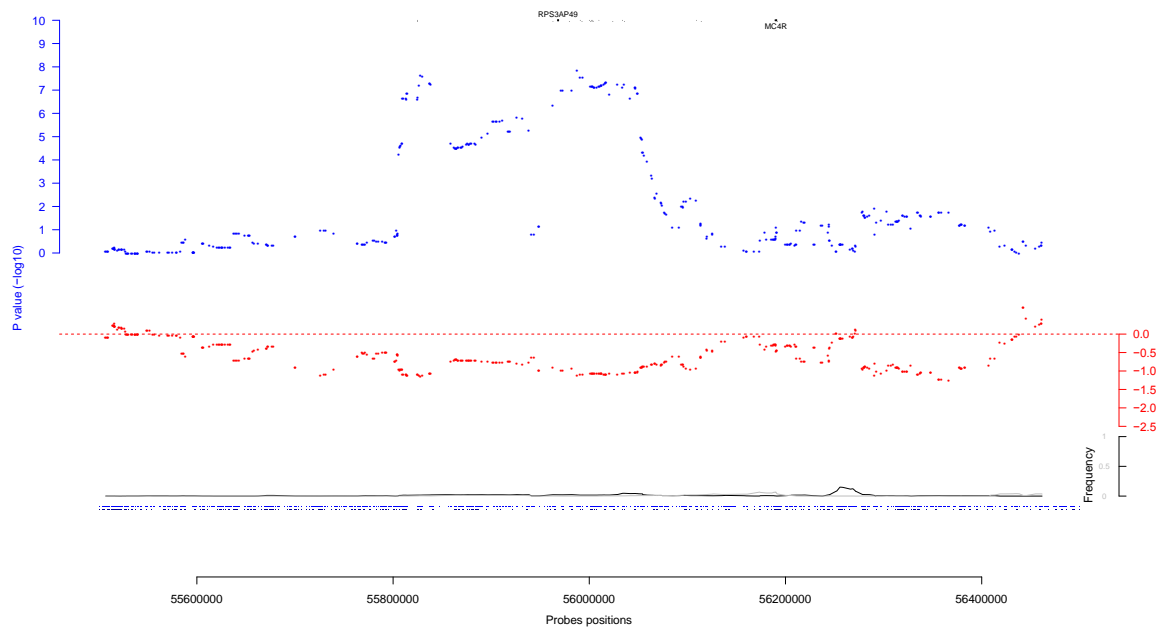

**Supplementary Figure 9: (A)** Local Manhattan plot on the rearrangement near MC4R. The blue dots correspond to the probes p-values of the association with the Height. The red dots are the corresponding effect sizes. At the bottom the black and grey lines are the deletions and duplications frequencies. Finally, the dots at the bottom are the probes positions for the GIANT cohorts above and the UK Biobank below. The position of the MC4R gene is set at

the top of the plot with the position of the BMI associated probes from GWAS. **(B)** Local Manhattan plot on the rearrangement near MC4R. The blue dots correspond to the probes p-values of the association with the Weight. The red dots are the corresponding effect sizes. At the bottom the black and grey lines are the deletions and duplications frequencies. Finally, the dots at the bottom are the probes positions for the GIANT cohorts above and the UK Biobank below. The position of the MC4R gene is set at the top of the plot with the position of the BMI associated probes from GWAS.



**A**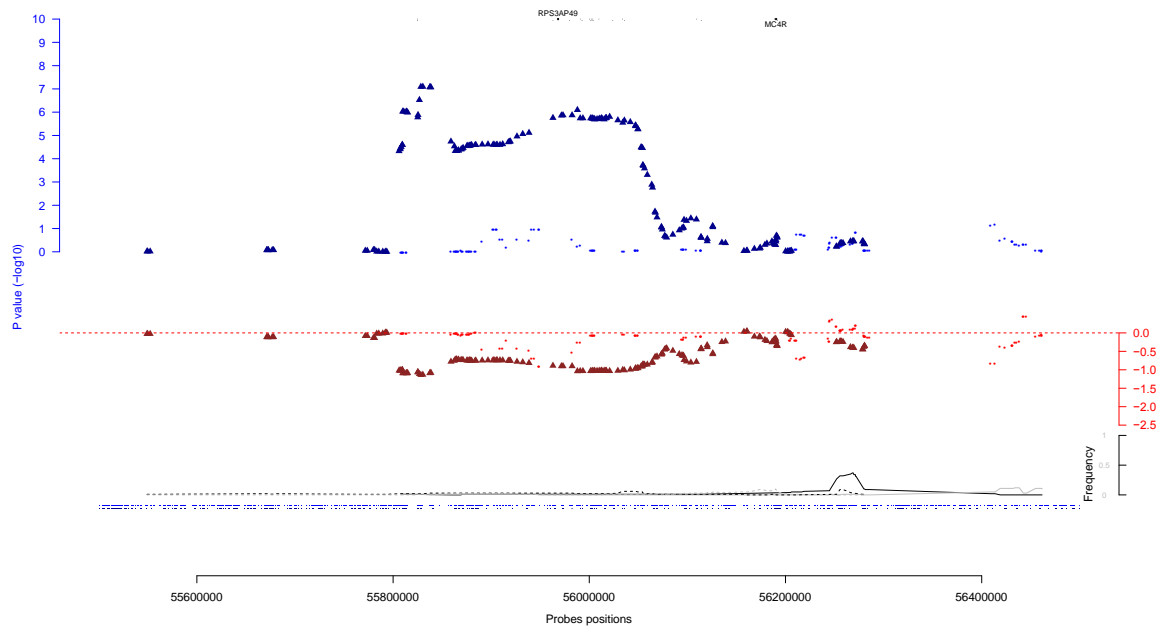**B**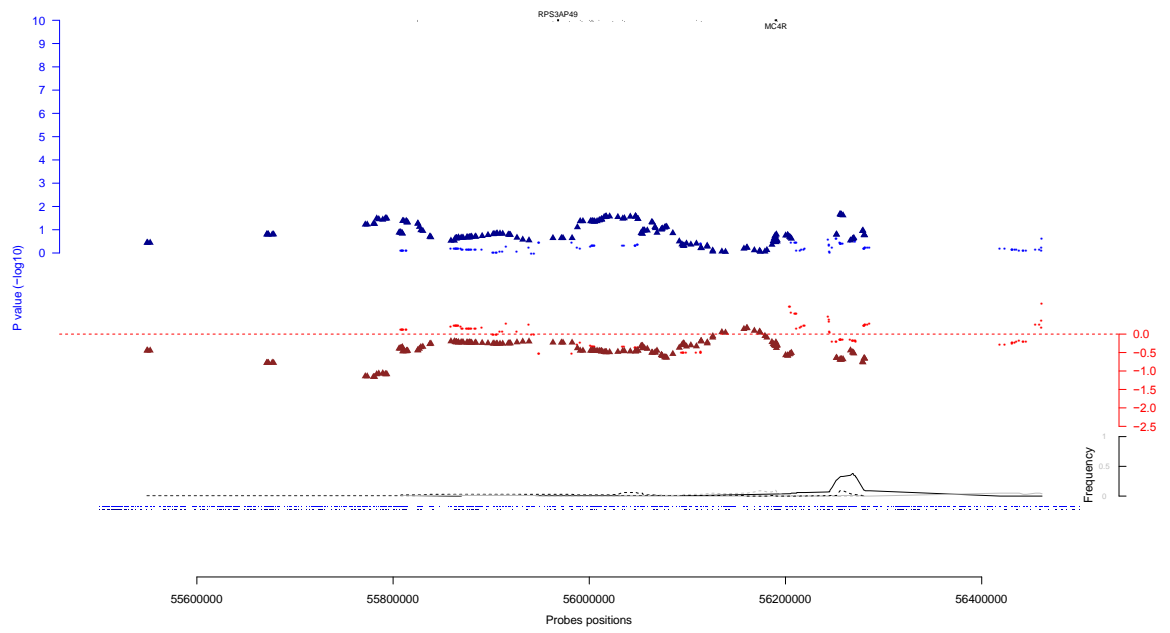

**C**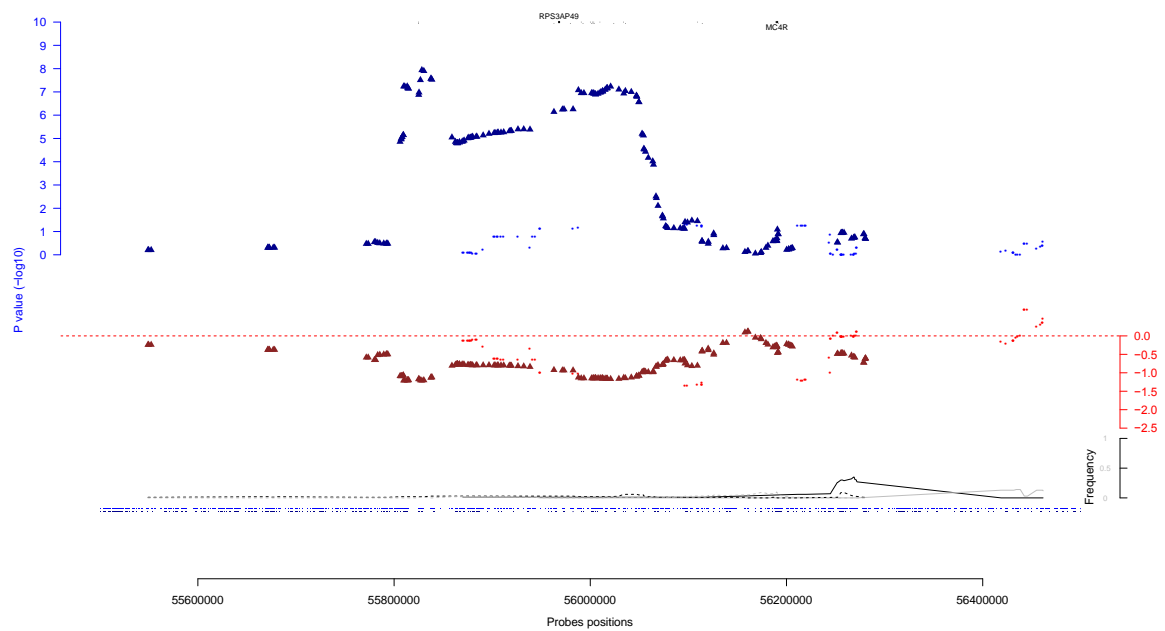

**Supplementary Figure 10: (A)** Local Manhattan plot on the rearrangement near MC4R, separately for the GIANT data (dot) and the UKBB data (triangles). The blue dots/triangles correspond to the probes p-values of the association with the BMI. The red dots/triangles are the corresponding effect sizes. At the bottom the black and grey lines are the deletions and duplications frequencies. The plain one corresponds to the GIANT data while the dash one to the UKBB. Finally, the dots at the bottom are the probes positions for the GIANT cohorts above and the UK Biobank below. The position of the MC4R gene is set at the top of the plot with the position of the BMI associated probes from GWAS. **(B)** Local Manhattan plot on the rearrangement near MC4R, separately for the GIANT data (dot) and the UKBB data (triangles). The blue dots/triangles correspond to the probes p-values of the association with the Height. The red dots/triangles are the corresponding effect sizes. At the bottom the black and grey lines are the deletions and duplications frequencies. The plain one corresponds to the GIANT data while the dash one to the UKBB. Finally, the dots at the bottom are the probes positions for the GIANT cohorts above and the UK Biobank below. The position of the MC4R gene is set at the top of the plot with the position of the BMI associated probes from GWAS. **(C)** Local Manhattan plot on the rearrangement near MC4R, separately for the GIANT data (dot) and the UKBB data (triangles). The blue dots/triangles correspond to the probes p-values of the association with the Weight. The red dots/triangles are the corresponding effect sizes. At the bottom the black and grey lines are the deletions and duplications frequencies. The plain one corresponds to the GIANT data while the dash one to the UKBB. Finally, the dots at the bottom are the probes positions for

the GIANT cohorts above and the UK Biobank below. The position of the MC4R gene is set at the top of the plot with the position of the BMI associated probes from GWAS.

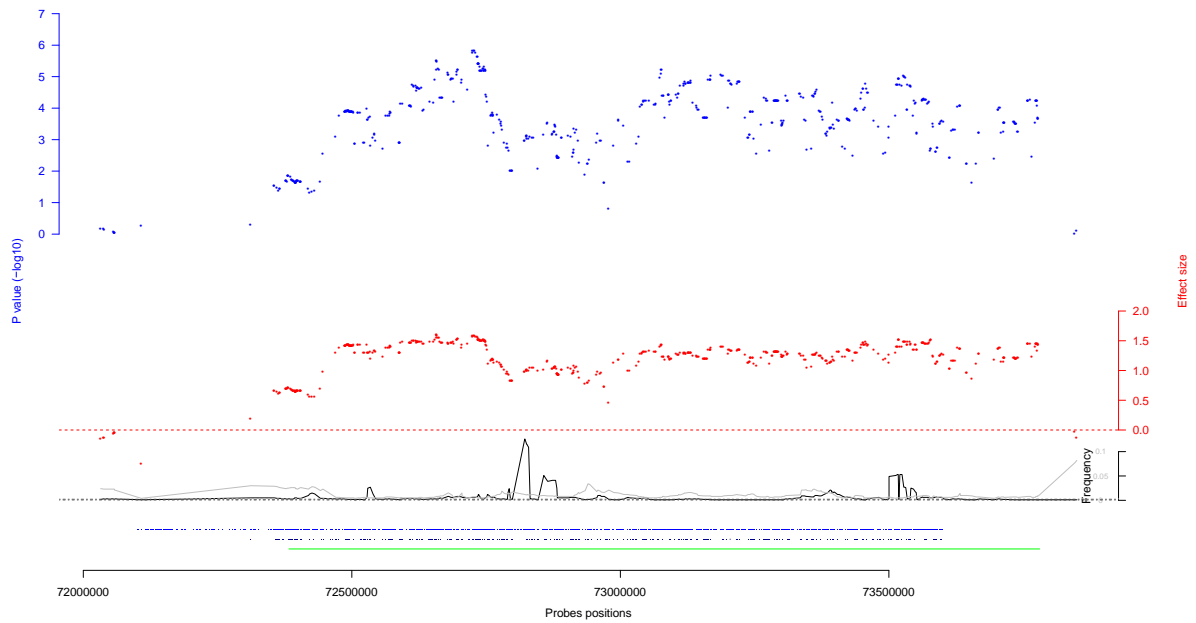

**Supplementary Figure 11:** Local Manhattan plot on the 7q11.23 rearrangement. The blue dots correspond to the probes p-values of the association with the Waist-Hip ratio. The red dots are the corresponding effect sizes. At the bottom the black and grey lines are the deletions and duplications frequencies. Finally, the dots at the bottom are the probes positions for the GIANT cohorts above and the UK Biobank below. The green line represents the known syndromic CNV in the region.

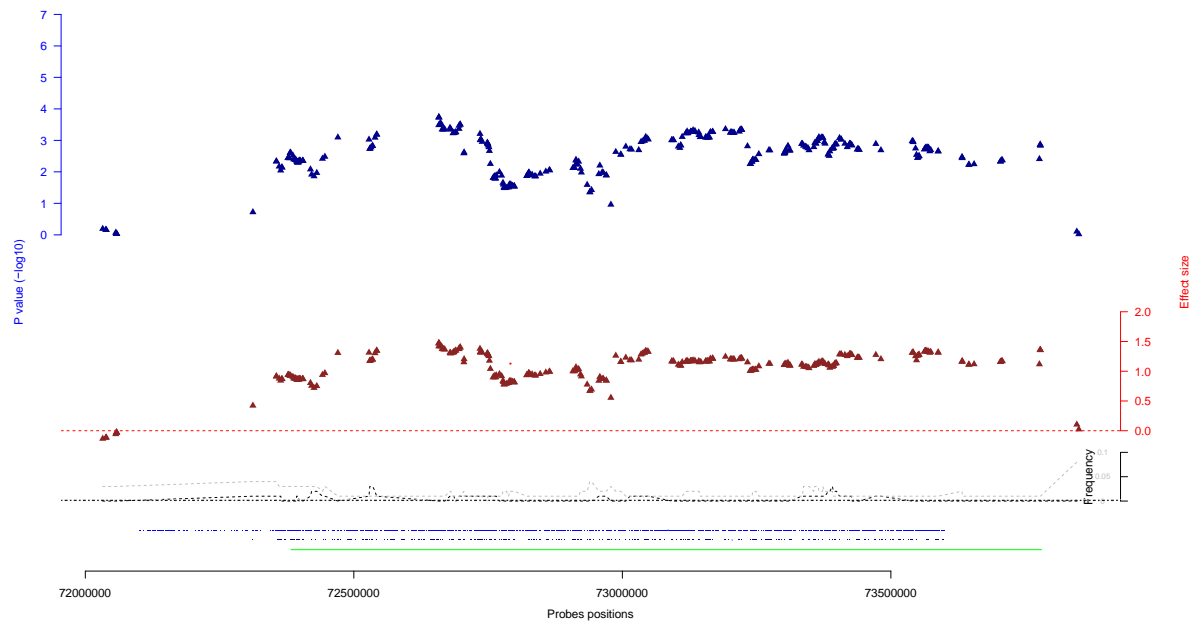

**Supplementary Figure 12:** Local Manhattan plot on the 7q11.23 rearrangement, separately for the GIANT data (dot) and the UKBB data (triangles). The blue dots/triangles correspond to the probes p-values of the association with the Waist-Hip ratio. The red dots/triangles are the corresponding effect sizes. At the bottom the black and grey lines are the deletions and duplications frequencies. The plain one corresponds to the GIANT data while the dash one to the UKBB. Finally, the dots at the bottom are the probes positions for the GIANT cohorts above and the UK Biobank below. The green line represents the known syndromic CNV in the region.

**A**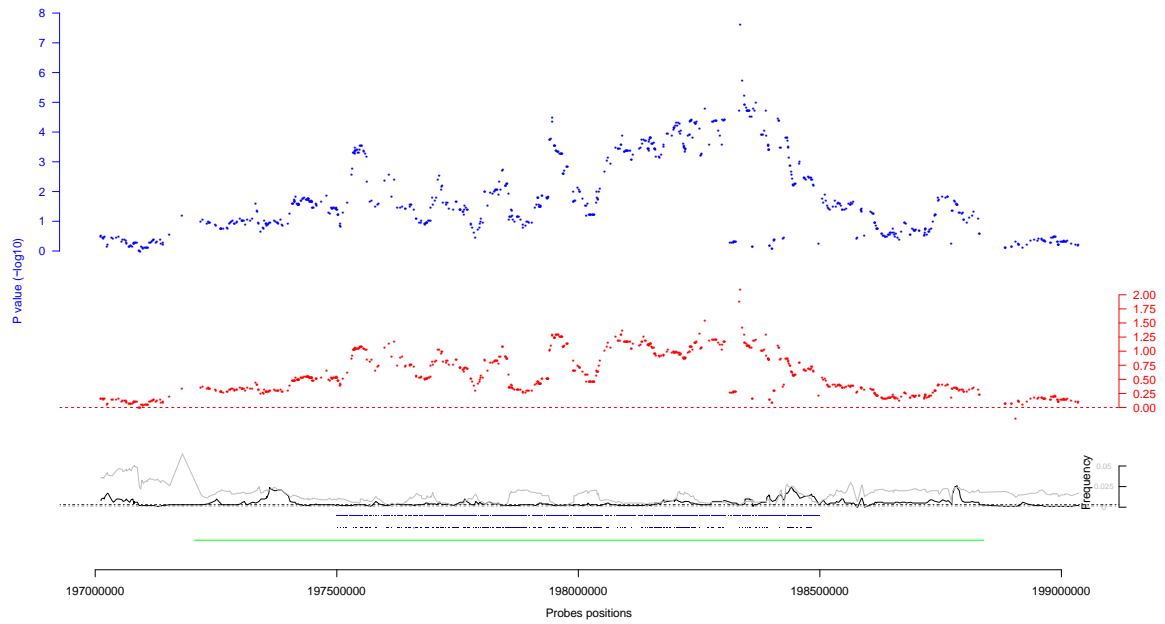**B**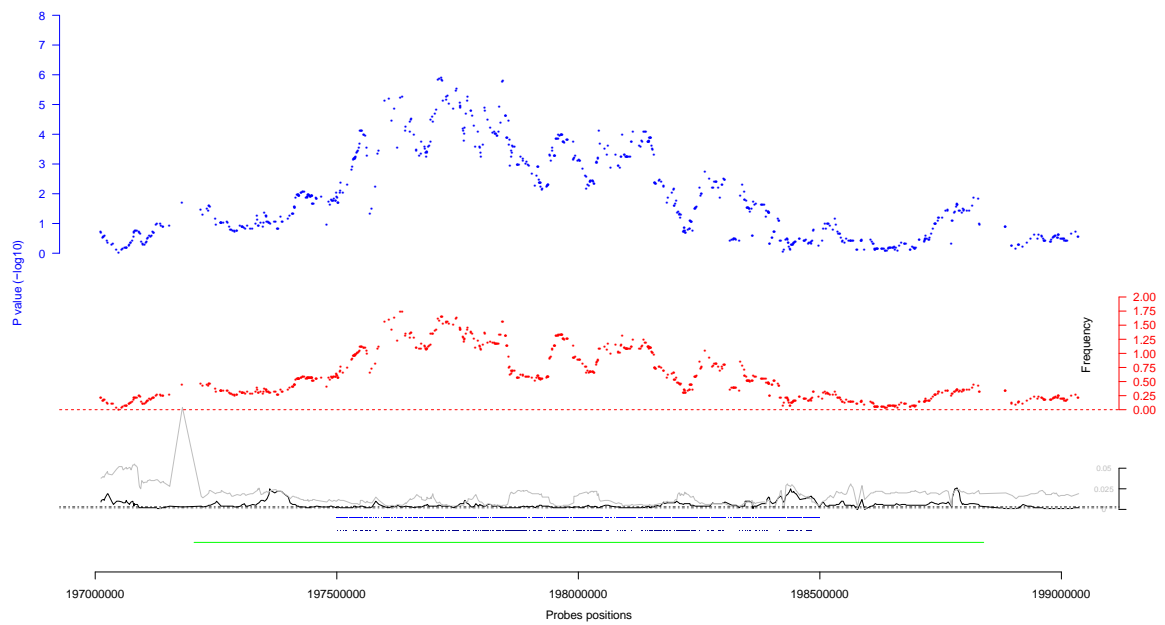

**Supplementary Figure 13: (A)** Local Manhattan plot on the 3q29 rearrangement. The blue dots correspond to the probes p-values of the association with the Height. The red dots are the corresponding effect sizes. At the bottom the black and grey lines are the deletions and duplications frequencies. Finally, the dots at the bottom are the probes positions for the GIANT cohorts above and the UK Biobank below. The green line represents the known

syndromic CNV in the region. **(B)** Local Manhattan plot on the 3q29 rearrangement. The blue dots correspond to the probes p-values of the association with the Weight. The red dots are the corresponding effect sizes. At the bottom the black and grey lines are the deletions and duplications frequencies. Finally, the dots at the bottom are the probes positions for the GIANT cohorts above and the UK Biobank below. The green line represents the known syndromic CNV in the region.

**A**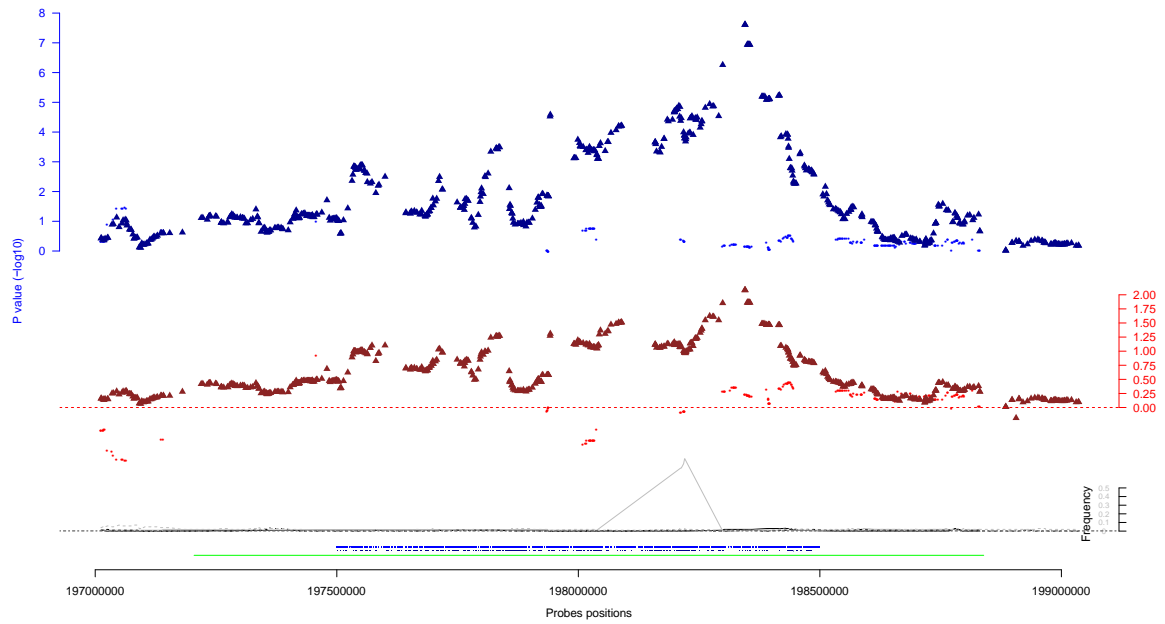**B**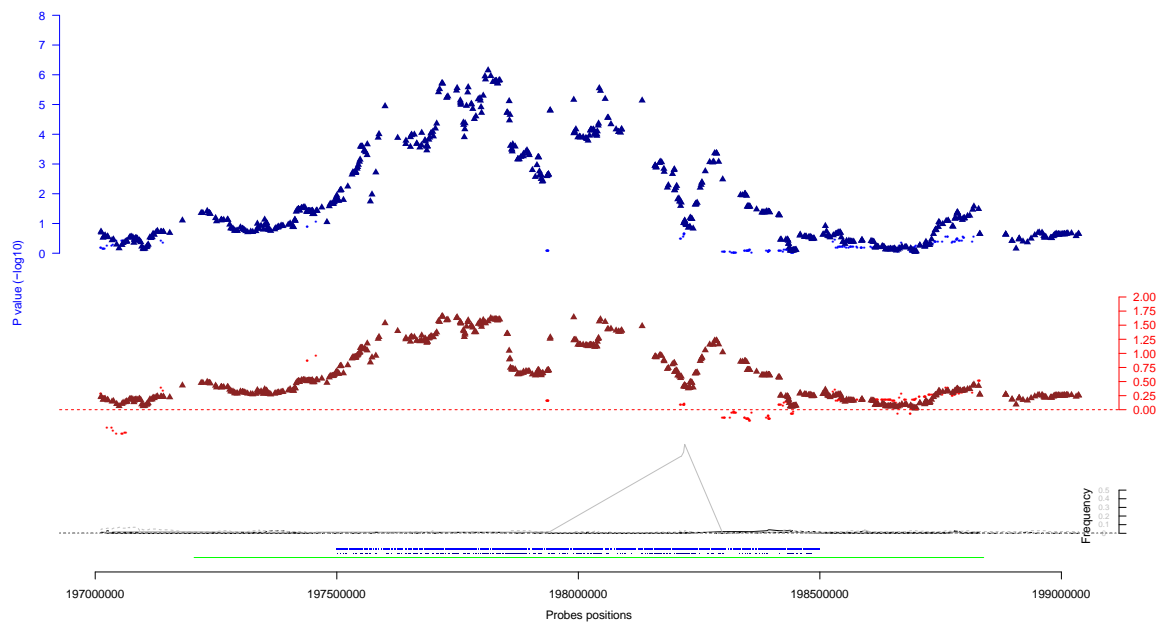

**Supplementary Figure 14: (A)** Local Manhattan plot on the 3q29 rearrangement, separately for the GIANT data (dot) and the UKBB data (triangles). The blue dots/triangles correspond to the probes p-values of the association with the Height. The red dots/triangles are the corresponding effect sizes. At the bottom the black and grey lines are the deletions and duplications frequencies. The plain one corresponds to the GIANT data while the dash one



to the UKBB. Finally, the dots at the bottom are the probes positions for the GIANT cohorts above and the UK Biobank below. The green line represents the known syndromic CNV in the region. **(B)** Local Manhattan plot on the 3q29 rearrangement, separately for the GIANT data (dot) and the UKBB data (triangles). The blue dots/triangles correspond to the probes p-values of the association with the Weight. The red dots/triangles are the corresponding effect sizes. At the bottom the black and grey lines are the deletions and duplications frequencies. The plain one corresponds to the GIANT data while the dash one to the UKBB. Finally, the dots at the bottom are the probes positions for the GIANT cohorts above and the UK Biobank below. The green line represents the known syndromic CNV in the region.

**A**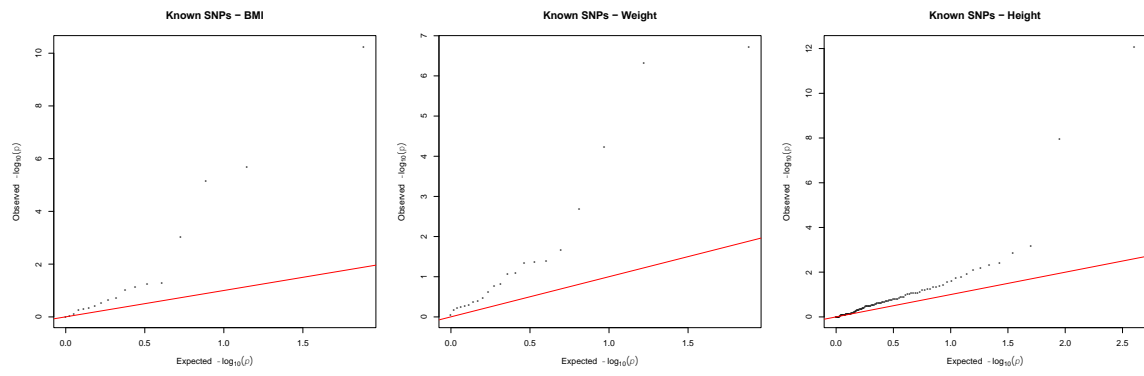**B**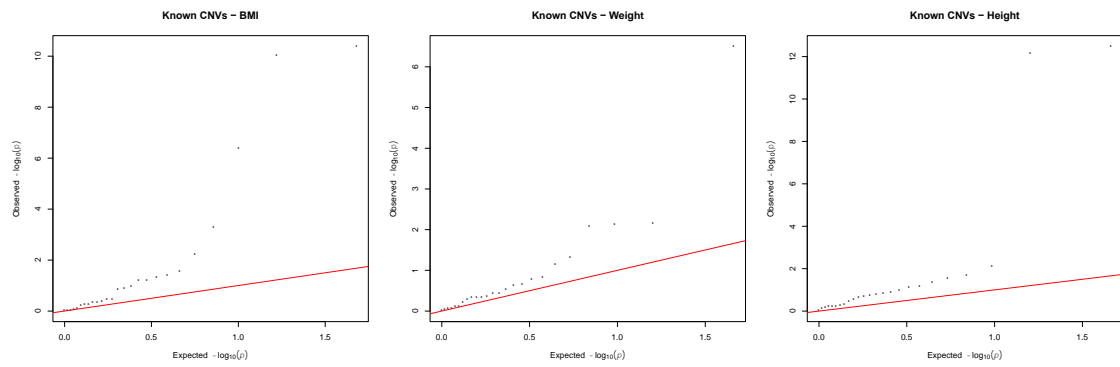**C**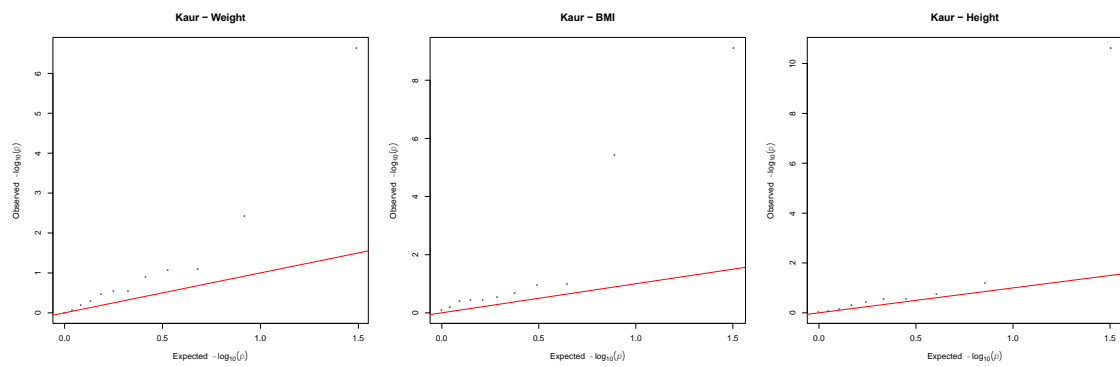**D**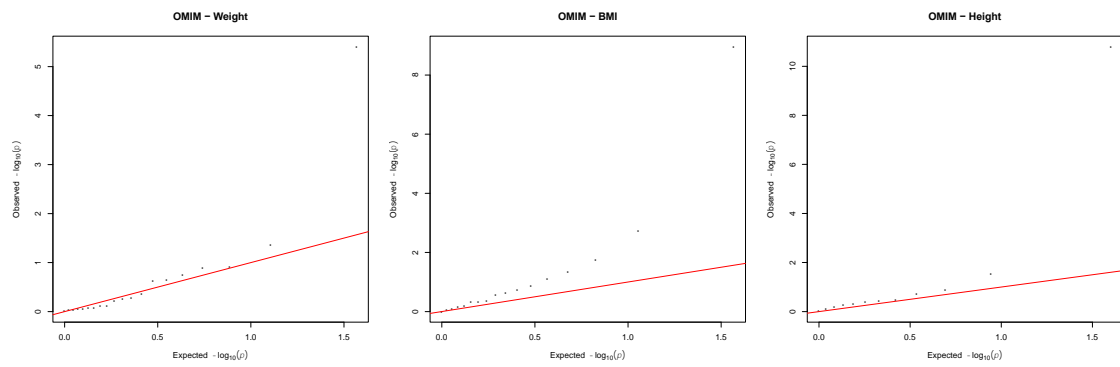

**Supplementary Figure 15:** Q-Q plots for the association between probes falling in various candidate regions. The columns correspond to the traits of interest: BMI (left), weight (middle) and height (right). **(A)** Regions are selected to be within 500kb vicinity of SNPs associated with BMI<sup>1</sup> or height<sup>2</sup>. For the 97 and 423 candidate regions for BMI and height, respectively, we did not observe significant enrichment of CNVs with  $minP < 0.05$  (Supplementary Table 24). Beyond the already known 16p11.2 CNV, the *MC4R* CNVs survived multiple testing correction for BMI and the 1q21.1 CNV (close to the height SNP rs6658763 in gene *FMO5*) for height. Note however that both were picked up in the genome-wide scan and hence described in detail in the main text. **(B)** Regions selected based on 59 previously BMI-associated CNVs (Peterson et al. <sup>3</sup>), out of which we tested 39 that were covered by probes with high quality CNV calls ( $r^2 > 0.5$ ). For all probes within these CNVs we collected the association p-values for BMI. For each of these CNVs we then calculated the minimal association P-value in our study for BMI and corrected them for the number of encompassed independent probes in the given CNV, denoting it with  $minP$ . We observed four CNVs with  $minP < 0.05$ , corresponding to 2.1-fold enrichment ( $P = 0.04$ ). Only the 16p11.2 CNVs survive multiple testing correction ( $minP < 0.05/39$ ) (Supplementary Table 25). **(C)** We repeated the experiment with a newly proposed set of genes shown to be involved in some genetic syndrome with obesity<sup>4</sup>. Out of the testable 65 unique candidate genes 57 are located on autosomes, among these 54 had copy number variant probes, 32 of which with reasonable imputation quality ( $r^2 > 0.5$ ). We observed a non-significant 1.2-fold enrichment of candidates with  $minP < 0.05$  ( $P = 0.21$ ). Note that 23 of the 32 genes had corrected P-value equal to 1, thus only 10 distinct points are visible. Only the 16p11.2 CNV survived multiple testing correction. **(D)** Finally, we looked at regions harbouring genes related to syndromic height and or weight alterations according to the OMIM repository<sup>5</sup> (selection made on height-, weight- and BMI-related key words). We observed a slight inflation on the QQ-plots for the 37 BMI / weight and 40 height candidates and found 2.2-fold enrichment of candidates with  $minP < 0.05$  for BMI ( $P = 0.04$ ). Here again, only the 16p11.2 CNV survived multiple testing correction.

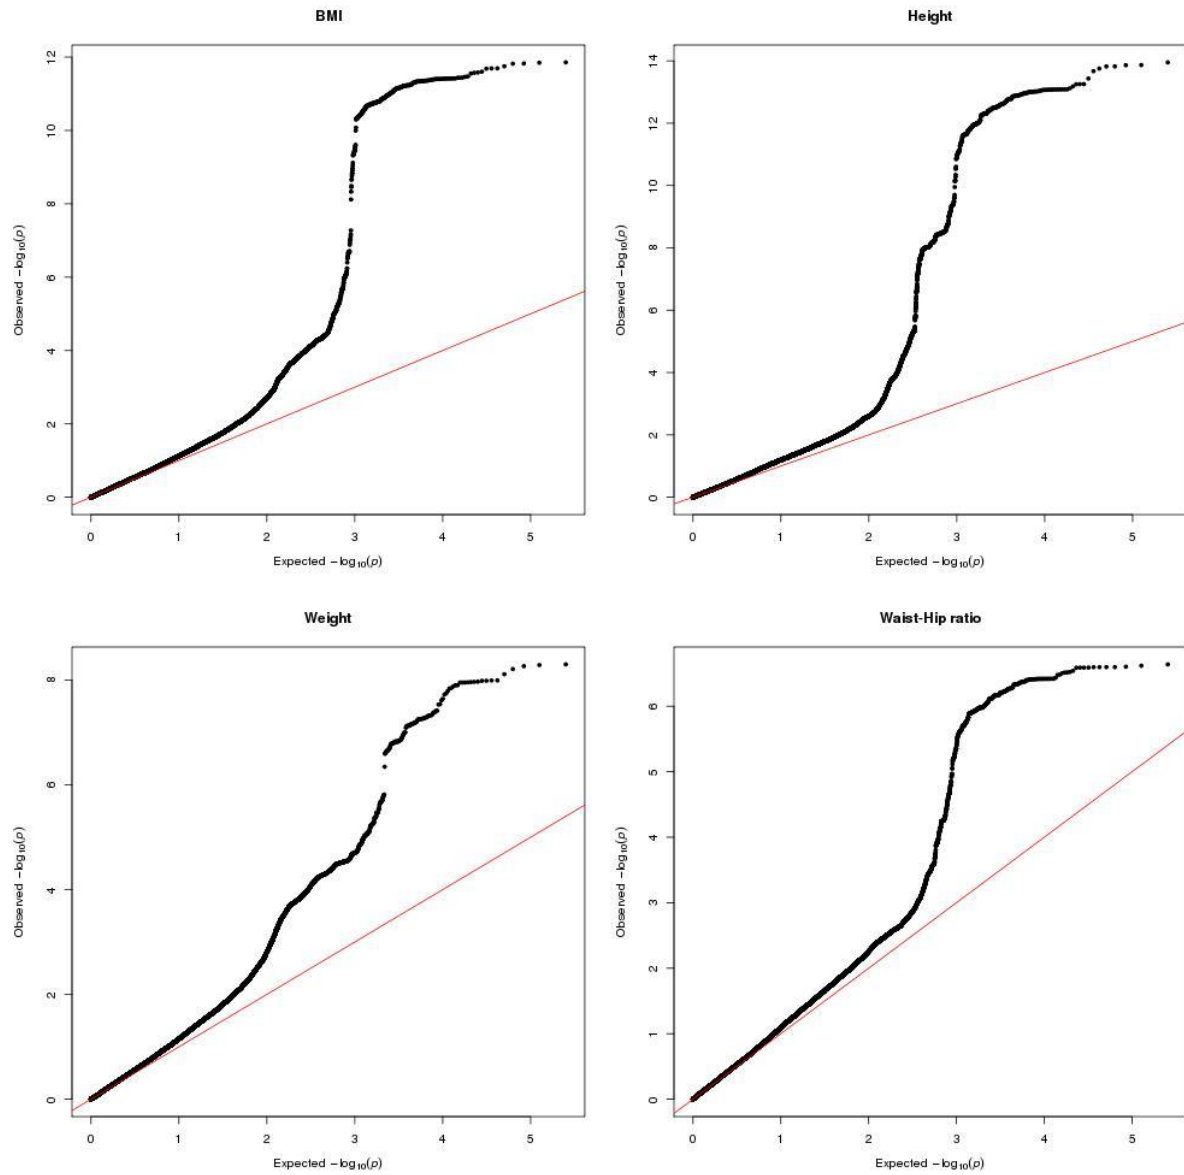

**Supplementary Figure 16:** Quantile-quantile plots of the copy number association P-values for BMI, height, weight and waist-to-hip ratio.

## Supplementary Tables

|        | Beta       |           |           |           | P-value    |          |          |          |
|--------|------------|-----------|-----------|-----------|------------|----------|----------|----------|
|        | All mirror | del       | dup       | U-shaped  | All mirror | del      | dup      | U-shaped |
| BMI    | 3.33E-02   | 1.44E-01  | 3.15E-02  | 4.98E-02  | 3.74E-02   | 2.85E-03 | 1.40E-01 | 1.06E-02 |
| Weight | 2.35E-02   | 1.12E-01  | 1.12E-02  | 2.73E-02  | 6.22E-01   | 4.46E-01 | 8.61E-01 | 6.42E-01 |
| Height | -8.37E-02  | -4.13E-01 | -7.84E-02 | -1.32E-01 | 8.56E-05   | 2.51E-10 | 6.00E-03 | 4.46E-07 |
| WHR    | 6.93E-04   | 2.94E-03  | 8.21E-04  | 1.15E-03  | 3.37E-03   | 6.03E-05 | 9.18E-03 | 6.90E-05 |

**Supplementary Table 1:** CNV burden analysis results per trait and CNV categories.

| chr                        | start | end   | Beta BMI |      |      | P val BMI |          |          | R square BMI |      |      | Beta WT  |       |       | P val WT  |          |          |
|----------------------------|-------|-------|----------|------|------|-----------|----------|----------|--------------|------|------|----------|-------|-------|-----------|----------|----------|
|                            |       |       | mirror   | del  | dup  | mirror    | del      | dup      | mirror       | del  | dup  | mirror   | del   | dup   | mirror    | del      | dup      |
| 1                          | 145   | 145.9 | 0.92     | -    | 1.37 | 3.97E-02  | 1.41E-01 | 1.78E-02 | 0.80         | 0.77 | 0.50 | 6.66     | -9.66 | 6.27  | 1.73E-06  | 1.52E-05 | 4.83E-04 |
| 3                          | 197.7 | 197.9 | 5.00     |      | 7.2  | 1.55E-03  |          | 6.17E-04 | 0.98         |      | 0.64 | 22.55    |       | 24.14 | 1.59E-06  |          | 1.20E-04 |
| 3                          | 198.2 | 198.4 | 2.93     |      | 2.71 | 3.53E-02  |          | 1.89E-01 | 1.00         |      | 0.65 | 15.88    | 11.68 | 11.49 | 1.22E-04  | 5.13E-02 | 6.18E-02 |
| 7                          | 72.66 | 72.75 | 4.59     |      |      | 4.40E-03  |          |          | 0.97         |      |      | 14.41    |       |       | 2.60E-03  |          |          |
| 11                         | 26.97 | 27.19 | 1.46     | -    | 2.01 | 5.89E-02  | 1.55E-01 | 1.15E-01 | 0.86         | 0.92 | 0.96 | 2.82     | -3.09 | 3.02  | 1.09E-02  | 9.52E-03 | 4.55E-01 |
| 16                         | 28.73 | 28.95 | -3.07    | 5.16 | 2.08 | 5.31E-08  | 5.51E-06 | 4.44E-03 | 0.76         | 0.78 | 0.59 | -10.35   | 14.57 | -8.01 | 5.03E-09  | 1.44E-05 | 3.46E-04 |
| 16                         | 29.5  | 30.11 | -3.66    | 6.15 | 1.81 | 1.39E-12  | 4.48E-14 | 1.16E-02 | 1.00         | 0.99 | 0.77 | -6.57    | 12.5  | -2.52 | 5.25E-05  | 1.79E-06 | 2.83E-01 |
| 18                         | 55.81 | 56.05 | -5.06    | 5.66 | 2.22 | 2.03E-07  | 5.75E-08 | 2.24E-01 | 0.92         | 0.92 | 0.60 | -15.94   | 17.43 | 3.77  | 1.45E-08  | 2.16E-08 | 5.27E-01 |
| Close to significance CNVs |       |       |          |      |      |           |          |          |              |      |      |          |       |       |           |          |          |
| 2                          | 111.3 | 111.5 | -2.30    | 2.54 | 2.22 | 6.23E-04  | 1.38E-02 | 1.88E-02 | 1.00         | 1.00 | 1.00 | -8.97    | 7.11  | -9.98 | 1.33E-05  | 2.52E-02 | 2.82E-04 |
| 2                          | 112.4 | 112.5 | -2.15    | 2.19 | 2.03 | 4.96E-04  | 4.07E-02 | 8.15E-03 | 0.91         | 0.91 | 0.91 | -8.77    | 7.64  | -8.43 | 1.74E-05  | 3.26E-02 | 2.68E-04 |
| 15                         | 20.33 | 20.62 | -0.22    | 0.36 | 1.52 | 2.78E-01  | 2.97E-01 | 9.93E-02 | 0.94         | 0.96 | 0.88 | 1.2      | -2.18 | 0.48  | 5.88E-03  | 2.55E-03 | 3.75E-01 |
| 22                         | 17.41 | 18.69 | 2.11     | 4    | 2.05 | 1.70E-05  | 1.54E-02 | 4.43E-06 | 0.96         | 0.97 | 0.94 | 5.01     | 6.12  | 5.09  | 5.83E-04  | 2.05E-01 | 1.52E-03 |
| 22                         | 19.07 | 19.33 | 1.85     | 1.71 | 1.89 | 3.82E-06  | 1.80E-01 | 1.40E-05 | 1.00         | 1.00 | 1.00 | 4.98     | -8.42 | 5.28  | 5.26E-05  | 9.59E-02 | 5.95E-05 |
| chr                        | start | end   | Beta HT  |      |      | P val HT  |          |          | R square HT  |      |      | Beta WHR |       |       | P val WHR |          |          |
|                            |       |       | mirror   | del  | dup  | mirror    | del      | dup      | mirror       | del  | dup  | mirror   | del   | dup   | mirror    | del      | dup      |
| 1                          | 145   | 145.9 | 3.46     | -    | 2.22 | 3.75E-10  | 3.30E-11 | 1.27E-03 | 0.93         | 0.95 | 0.89 | 0.020    | 0.010 | 0.028 | 2.24E-03  | 3.02E-01 | 1.46E-03 |
| 3                          | 197.7 | 197.9 | 8.29     |      | 1.44 | 3.12E-05  |          | 3.95E-01 | 0.96         |      | 0.93 | 0.028    | 0.060 | 0.095 | 3.03E-02  | 1.35E-01 | 4.50E-03 |
| 3                          | 198.2 | 198.4 | 13.3     |      |      | 2.32E-08  |          |          | 0.95         |      |      | -0.046   | 0.061 | 0.067 | 8.07E-03  | 2.16E-02 | 2.88E-02 |
| 7                          | 72.66 | 72.75 | 3.14     |      |      | 1.91E-01  |          |          | 0.73         |      |      | 0.111    | 0.153 | 0.104 | 1.49E-06  | 2.75E-02 | 8.43E-05 |
| 11                         | 26.97 | 27.19 | 2.43     | -    | 2.64 | 1.46E-06  | 8.24E-08 | 1.24E-01 | 0.95         | 0.82 | 0.89 | 0.022    | 0.014 | 0.053 | 5.69E-02  | 2.11E-01 | 7.41E-02 |
| 16                         | 28.73 | 28.95 | -1.6     | 0.62 | 2.81 | 4.24E-02  | 6.79E-01 | 5.29E-03 | 0.97         | 0.96 | 0.97 | -0.024   | 0.057 | 0.037 | 1.25E-02  | 8.67E-04 | 2.20E-01 |
| 16                         | 29.5  | 30.11 | 5.21     | 8.32 | 3.43 | 1.12E-14  | 5.44E-14 | 3.04E-04 | 0.99         | 0.98 | 0.97 | -0.041   | 0.092 | 0.057 | 2.30E-07  | 2.20E-11 | 3.02E-02 |
| 18                         | 55.81 | 56.05 | -3.16    | 2.87 | 2.93 | 1.41E-02  | 4.20E-02 | 2.37E-01 | 0.97         | 0.97 | 0.64 | -0.036   | 0.035 | 0.059 | 8.86E-03  | 2.41E-02 | 2.15E-01 |
| Close to significance CNVs |       |       |          |      |      |           |          |          |              |      |      |          |       |       |           |          |          |
| 2                          | 111.3 | 111.5 | -2.74    | 0.81 | 4.06 | 2.26E-03  | 5.73E-01 | 4.86E-04 | 0.99         | 1.00 | 0.98 | -0.015   | 0.032 | 0.032 | 1.61E-01  | 6.00E-02 | 3.90E-01 |
| 2                          | 112.4 | 112.5 | -2.18    | 0.99 | 3.21 | 7.89E-03  | 4.93E-01 | 1.61E-03 | 0.88         | 1.00 | 0.98 | -0.014   | 0.028 | 0.011 | 1.52E-01  | 1.33E-01 | 3.55E-01 |
| 15                         | 20.33 | 20.62 | 0.74     | 1.49 | 0.38 | 8.10E-06  | 3.14E-08 | 1.28E-01 | 0.95         | 0.94 | 0.95 | 0.002    | 0.006 | 0.007 | 3.48E-01  | 3.16E-02 | 1.08E-02 |
| 22                         | 17.41 | 18.69 | -1.36    | 6.76 | 1.84 | 2.89E-02  | 1.37E-03 | 5.64E-03 | 0.97         | 0.96 | 1.00 | 0.027    | 0.067 | 0.022 | 3.11E-03  | 8.13E-03 | 9.17E-04 |
| 22                         | 19.07 | 19.33 | -0.62    | 2.44 | 1.99 | 2.94E-01  | 1.63E-01 | 2.49E-01 | 1.00         | 1.00 | 0.58 | 0.020    | 0.041 | 0.022 | 1.55E-03  | 1.96E-01 | 4.58E-04 |

**Supplementary Table 2:** CNV association meta-analysis results considering mirror, only deletion and only duplication effects models. (Human genome build 36)

| Chr | Start (Mb) | End (Mb) | Genes                                                                                                                                                                                                                        | OMIM diseases                                                                                                                                                                                                                                                                                                                                                                                                                                                                                                                          |
|-----|------------|----------|------------------------------------------------------------------------------------------------------------------------------------------------------------------------------------------------------------------------------|----------------------------------------------------------------------------------------------------------------------------------------------------------------------------------------------------------------------------------------------------------------------------------------------------------------------------------------------------------------------------------------------------------------------------------------------------------------------------------------------------------------------------------------|
| 1   | 145        | 145.9    | RN7SL261P RNVU1-8 CHD1L NBPFI3P GJA8 OR13Z3P LINC00624 OR13Z2P OR13Z1P PDIA3P1 FMO5 RPL7AP15 CCT8P1 PRKAB2 GJA5 GPR89B BCL9 ACP6                                                                                             | Atrial_fibrillation,_familial,_11,_614049_(3),_Autosomal_dominant<br>Atrial_standstill,_digenic_(GJA5/SCN5A),_108770_(3),_Autosomal_dominant<br>Cataract_1,_multiple_types,_116200_(3),_Autosomal_dominant                                                                                                                                                                                                                                                                                                                             |
| 16  | 28.73      | 28.95    | MIR4721 MIR4517 ATXN2L SH2B1 CD19 RABEP2 TUFM ATP2A1 NFATC2IP ATP2A1-AS1 LAT SPNS1                                                                                                                                           | Combined_oxidative_phosphorylation_deficiency_4,_610678_(3)<br>Brody_myopathy,_601003_(3),_Autosomal_recessive<br>Immunodeficiency,_common_variable,_3,_613493_(3),_Autosomal_recessive                                                                                                                                                                                                                                                                                                                                                |
| 16  | 29.5       | 30.1     | MIR3680-2 RN7SKP127 C16orf54 PAGR1 CORO1A MAZ ALDOA CDIPT MVP ZG16 SEZ6L2 CDIPT-AS1 PRRT2 YPEL3 TMEM219 DOC2A GDPD3 INO80E KCTD13 HIRIP3 ASPHD1 MAPK3 TAOK2 PPP4C FAM57B C16orf92 SMG1P2 SLC7A5P1 CA5AP1 QPRT SPN TBX6 KIF22 | Spondyloepimetaphyseal_dysplasia_with_joint_laxity,_type_2,_603546_(3),_Autosomal_dominant<br>Convulsions,_familial_infantile,_with_paroxysmal_choreoathetosis,_602066_(3),_Autosomal_dominant<br>_Episodic_kinesigenic_dyskinesia_1,_128200_(3),_Autosomal_dominant<br>_Seizures,_benign_familial_infantile,_2,_605751_(3),_Autosomal_dominant<br>Glycogen_storage_disease_XII,_611881_(3),_Autosomal_recessive<br>Spondylocostal_dysostosis_5,_122600_(3),_Autosomal_dominant<br>Immunodeficiency_8,_615401_(3),_Autosomal_recessive |

**Supplementary Table 3:** List of OMIM diseases for the genes located in the discovered CNVs. Only three CNVs contained genes related to OMIM diseases. (human genome build 36)

| Pheno                                      | Beta (Inverse Norm) | P           |
|--------------------------------------------|---------------------|-------------|
| Reaction Time when Paying SNAP             | 1.00317961301502    | 5.81999E-05 |
| Waist Circumference                        | 1.37197342090424    | 0.000113284 |
| BMI                                        | 1.31488002324912    | 0.000216001 |
| Basal Metabolic Rate                       | 1.28061436732642    | 0.000314676 |
| Townsend Deprivation Index                 | 0.824668449619557   | 0.000521569 |
| Mental Health Score                        | 2.27456836098822    | 0.001463805 |
| Hearing Right                              | 2.9938759978349     | 0.00171535  |
| Income Category                            | -0.836122729862511  | 0.00184698  |
| Hand Grip Strength                         | -1.76087217905607   | 0.002472095 |
| Height                                     | 1.34326187246243    | 0.002747451 |
| Forced Vital Capacity                      | -1.09919898286292   | 0.003410296 |
| Bodyfat Percentage                         | 1.00060529716209    | 0.00487609  |
| Fluid Intelligence Test Score              | -1.45747890521265   | 0.013103228 |
| Number of Depression Episodes              | 5.44797580489105    | 0.013407919 |
| Age At Menarche                            | -1.37000661836451   | 0.014310623 |
| Bone Mineral Density                       | 12.421391675403     | 0.016604821 |
| Forced Expiratory Volume                   | -0.566226688699171  | 0.02301327  |
| Diastolic Blood Pressure                   | -0.531416055206     | 0.039000511 |
| Age when left higher education             | -13.7931769953107   | 0.084191421 |
| Number of Hours Slept Per Night            | -0.445253506751197  | 0.098055243 |
| WHR corrected for BMI                      | -0.416673511307246  | 0.130104338 |
| Number of Government Health Advice Ignored | 8.41028932318149    | 0.139300258 |
| Hearing Left                               | -0.706324244835924  | 0.175876902 |
| Pairs Matching Test Score                  | 0.327003334128527   | 0.177431468 |
| Birthweight                                | 0.544289288478213   | 0.19444689  |
| General Happiness Score                    | 0.578526516814893   | 0.267346397 |
| Systolic Blood Pressure                    | 0.631905434350093   | 0.276574468 |

**Supplementary Table 4:** Top UK Biobank traits association – 16p11.2 220kb Deletion



| Pheno                                      | Beta (Inverse Norm) | P           |
|--------------------------------------------|---------------------|-------------|
| Forced Expiratory Volume                   | -1.16665918180088   | 9.96653E-07 |
| Hand Grip Strength                         | -1.42085821243649   | 2.75524E-05 |
| Forced Vital Capacity                      | -1.51127055927164   | 0.000135717 |
|                                            | -                   |             |
| Income Category                            | 0.636507603844169   | 0.000226834 |
|                                            | -                   |             |
| Age when left higher education             | 0.724872128280916   | 0.000521376 |
| Reaction Time when Paying SNAP             | 0.78068371874827    | 0.000572615 |
| Townsend Deprivation Index                 | 0.716772068895736   | 0.001019951 |
| Systolic Blood Pressure                    | 1.20115838609033    | 0.006725133 |
| Birthweight                                | 0.63769736386775    | 0.006826511 |
| Fluid Intelligence Test Score              | -0.78626798087886   | 0.006903458 |
| Hearing Right                              | 1.50223519328564    | 0.008576829 |
|                                            | -                   |             |
| Basal Metabolic Rate                       | 0.412179984464185   | 0.010134824 |
|                                            | -                   |             |
| BMI                                        | 0.400806059955445   | 0.011658998 |
| Bone Mineral Density                       | -0.40673802129927   | 0.012341872 |
|                                            | -                   |             |
| Bodyfat Percentage                         | 0.527408770942645   | 0.019984666 |
| Number of Government Health Advice Ignored | 0.691382076183591   | 0.020682411 |
| Age At Menarche                            | 0.530042233521143   | 0.028951357 |
| Diastolic Blood Pressure                   | 0.946819872774768   | 0.032662582 |
| Number of Depression Episodes              | -2.10459935533373   | 0.039050899 |
| Height                                     | 0.968071430550906   | 0.039216385 |
| Mental Health Score                        | 0.3603553649529     | 0.040528695 |
| Pairs Matching Test Score                  | 1.9813718334488     | 0.048629148 |
|                                            | -                   |             |
| Waist Circumference                        | 0.301237950238058   | 0.057804952 |
|                                            | -                   |             |
| WHR corrected for BMI                      | 0.578839011164971   | 0.063129236 |
| Hearing Left                               | 0.771186459244182   | 0.081212421 |
| Number of Hours Slept Per Night            | 1.72857449125901    | 0.085393952 |
| General Happiness Score                    | 0.817177716204734   | 0.122648178 |

**Supplementary Table 5:** Top UK Biobank traits association – 16p11.2 220kb Duplication

| Pheno                                      | Beta (Inverse Norm) | P           |
|--------------------------------------------|---------------------|-------------|
| Bodyfat Percentage                         | 1.67602288645414    | 2.85152E-13 |
| Waist Circumference                        | 1.59138567876272    | 3.47323E-13 |
| BMI                                        | 1.507991093061      | 5.45371E-12 |
| Forced Vital Capacity                      | -1.71837638025093   | 6.80729E-12 |
| Townsend Deprivation Index                 | 1.3519201060548     | 1.46053E-11 |
| Height                                     | -1.44694062381608   | 1.02805E-10 |
| Income Category                            | -1.48617024171029   | 4.42269E-10 |
| Forced Expiratory Volume                   | -1.52718398860764   | 1.07274E-09 |
| Hand Grip Strength                         | -1.25366176070497   | 1.3952E-09  |
| Birthweight                                | -24.413562402529    | 0.000663086 |
| Pairs Matching Test Score                  | 3.26474311293541    | 0.001154876 |
| Age At Menarche                            | -1.08838702695159   | 0.001248673 |
| Mental Health Score                        | -1.18006009631771   | 0.001997616 |
| Hearing Right                              | 1.51080468265243    | 0.002232018 |
| Reaction Time when Paying SNAP             | 0.76851872869137    | 0.002295937 |
| Bone Mineral Density                       | 0.863093422674174   | 0.002482608 |
| Number of Government Health Advice Ignored | 0.899851301036471   | 0.003524589 |
| Number of Depression Episodes              | 15.5668732945112    | 0.004996177 |
| Hearing Left                               | 1.15567077893393    | 0.005205249 |
| Basal Metabolic Rate                       | 0.835131109211715   | 0.012296668 |
| Fluid Intelligence Test Score              | -1.28637989085312   | 0.016493523 |
| Systolic Blood Pressure                    | 0.598220369311587   | 0.017624569 |
| WHR corrected for BMI                      | 2.27147205457894    | 0.023758019 |
| Diastolic Blood Pressure                   | 0.915990420047258   | 0.026426458 |
| Number of Hours Slept Per Night            | 1.26593940462379    | 0.029168054 |
| Age when left higher education             | -0.427704313588078  | 0.074265546 |
| General Happiness Score                    | 1.17321874481301    | 0.103167054 |

**Supplementary Table 6:** Top UK Biobank traits association – 16p11.2 600kb Deletion

| Pheno                                      | Beta (Inverse Norm) | P           |
|--------------------------------------------|---------------------|-------------|
| Bone Mineral Density                       | -0.740567984627244  | 1.21264E-05 |
| Reaction Time when Paying SNAP             | 0.768538430108658   | 2.20774E-05 |
| Mental Health Score                        | 1.50395410772168    | 6.50798E-05 |
| Age when left higher education             | 2.01516893752163    | 0.000542613 |
| Fluid Intelligence Test Score              | -1.42401828491299   | 0.000626779 |
| Townsend Deprivation Index                 | 1.22458374660638    | 0.001135683 |
| Income Category                            | -0.782895517463454  | 0.001559736 |
| Systolic Blood Pressure                    | -0.668623806892171  | 0.002253388 |
| Hand Grip Strength                         | -0.585129887482488  | 0.002258687 |
| Height                                     | 0.540983456555768   | 0.002392488 |
| Age At Menarche                            | 0.683432373697753   | 0.002859066 |
| General Happiness Score                    | 0.901502943851121   | 0.004052996 |
| Diastolic Blood Pressure                   | -0.619807879304054  | 0.004632047 |
| Number of Depression Episodes              | 1.29717891918402    | 0.00562968  |
| Forced Vital Capacity                      | -0.734918377470063  | 0.006426071 |
| Forced Expiratory Volume                   | -0.730805045822161  | 0.006729204 |
| Bodyfat Percentage                         | -0.455881499473242  | 0.007913018 |
| BMI                                        | -0.545792509228783  | 0.008953892 |
| WHR corrected for BMI                      | 1.00287662493425    | 0.014731776 |
| Birthweight                                | 0.599392287080348   | 0.017546555 |
| Number of Government Health Advice Ignored | 1.63368521958997    | 0.020999733 |
| Waist Circumference                        | -1.12949043737894   | 0.026039595 |
| Basal Metabolic Rate                       | -1.26949880676746   | 0.030306993 |
| Number of Hours Slept Per Night            | 1.39967987876525    | 0.049720071 |
| Pairs Matching Test Score                  | 0.800198859677159   | 0.053917198 |
| Hearing Right                              | -15.0929064726569   | 0.06068741  |
| Hearing Left                               | 1.20560783138371    | 0.234714015 |

**Supplementary Table 7:** Top UK Biobank traits association – 16p11.2 600kb Duplication

| Chr | Start (Mb) | End (Mb) | BMI       |              |          | Height     |              |          |
|-----|------------|----------|-----------|--------------|----------|------------|--------------|----------|
|     |            |          | SNP       | Nearest gene | P-value  | SNP        | Nearest gene | P-value  |
| 1   | 145        | 145.9    | -         | -            | -        | rs6658763  | FMO5         | 3.60E-11 |
| 16  | 28.73      | 28.95    | rs3888190 | ATP2A1       | 3.14E-23 | -          | -            | -        |
| 16  | 29.5       | 30.1     | -         | -            | -        | rs11642612 | FLJ25404     | 4.20E-08 |
| 18  | 55.81      | 56.05    | rs6567160 | MC4R         | 3.93E-53 | rs11152213 | MC4R         | 6.90E-13 |

**Supplementary Table 8:** Known SNPs (from previous BMI and height GWAS) and their nearest gene located in the discovered CNV. (Human genome build 36)

| SNP        | Allele | Gene   | SNP - Height |          | SNP - Expression |          | CNV - Height |          |
|------------|--------|--------|--------------|----------|------------------|----------|--------------|----------|
|            |        |        | Beta         | P-value  | Z score          | P-value  | Beta         | P-value  |
| rs11150581 | C      | CORO1A | -0.017       | 4.29E-08 | -4.45            | 8.60E-06 | 0.82         | 1.10E-14 |
| rs11642612 | C      | CORO1A | -0.018       | 1.24E-08 | -4.45            | 8.60E-06 | 0.82         | 1.10E-14 |
| rs11150581 | C      | INO80E | -0.017       | 4.29E-08 | -5.57            | 2.55E-08 | 0.82         | 1.10E-14 |
| rs11642612 | C      | INO80E | -0.018       | 1.24E-08 | -5.57            | 2.55E-08 | 0.82         | 1.10E-14 |
| rs2278557  | G      | INO80E | -0.017       | 4.64E-08 | -5.52            | 3.49E-08 | 0.82         | 1.10E-14 |
| rs6565173  | G      | INO80E | 0.016        | 6.68E-08 | 5.8              | 6.54E-09 | 0.82         | 1.10E-14 |
| rs9925915  | G      | INO80E | 0.016        | 8.97E-08 | 5.8              | 6.48E-09 | 0.82         | 1.10E-14 |

**Supplementary Table 9:** eQTLs SNPs located in the discovered CNVs and their effect on the gene expression and the trait of interest (height).

| Pheno                                      | Beta (Inverse Norm) | P           |
|--------------------------------------------|---------------------|-------------|
| Height                                     | -1.19391234559082   | 1.35706E-11 |
| Basal Metabolic Rate                       | -1.10744807923833   | 8.64828E-08 |
| Forced Expiratory Volume                   | -0.928102424720159  | 2.26727E-07 |
| Forced Vital Capacity                      | -0.919381302886394  | 2.93872E-07 |
| Hand Grip Strength                         | -0.678840894146804  | 1.05726E-05 |
| Income Category                            | -0.797375544388421  | 0.000164561 |
| Age At Menarche                            | -2.18111621831189   | 0.000181161 |
| WHR corrected for BMI                      | 1.21135856746827    | 0.001584752 |
| Birthweight                                | -1.47199099115565   | 0.003644883 |
| Pairs Matching Test Score                  | 0.616587892276118   | 0.004196544 |
| Hearing Left                               | -1.42549588498061   | 0.005746628 |
| Waist Circumference                        | -0.534637932226143  | 0.008312489 |
| Townsend Deprivation Index                 | 0.386471692056822   | 0.008422622 |
| Bone Mineral Density                       | -0.510569581710803  | 0.010557709 |
| BMI                                        | 0.663142062152245   | 0.014348222 |
| Reaction Time when Paying SNAP             | 0.383757729096462   | 0.01492828  |
| Age when left higher education             | -0.513806000930208  | 0.015202114 |
| Bodyfat Percentage                         | -0.483667006516757  | 0.019393833 |
| Number of Depression Episodes              | -67.4062302105066   | 0.021836674 |
| Systolic Blood Pressure                    | -0.319695603480369  | 0.024014062 |
| Number of Hours Slept Per Night            | -0.774320279114834  | 0.041964854 |
| Mental Health Score                        | 0.33584883482338    | 0.053873586 |
| Diastolic Blood Pressure                   | -0.268899170395633  | 0.067343385 |
| Hearing Right                              | -1.27529914599644   | 0.087466989 |
| General Happiness Score                    | -1.68598097949115   | 0.123367387 |
| Fluid Intelligence Test Score              | 0.492888873070761   | 0.400399548 |
| Number of Government Health Advice Ignored | 0.224845167635341   | 0.403158358 |

**Supplementary Table 10:** Top UK Biobank traits association – 1q21.1 Deletion

| Pheno                                      | Beta (Inverse Norm) | P           |
|--------------------------------------------|---------------------|-------------|
| Bodyfat Percentage                         | 0.51654168843782    | 9.08923E-05 |
| Forced Expiratory Volume                   | -0.683510779833834  | 0.000115131 |
| Townsend Deprivation Index                 | 1.19138021400774    | 0.000285928 |
| Income Category                            | -0.614381117971488  | 0.000300941 |
| Height                                     | 0.441894094239297   | 0.000541124 |
| Waist Circumference                        | 0.474845948716028   | 0.000615927 |
| Number of Depression Episodes              | -3.2983860848696    | 0.0014689   |
| Fluid Intelligence Test Score              | -0.713141844035933  | 0.001895973 |
| General Happiness Score                    | 0.629481571940363   | 0.00329901  |
| Reaction Time when Paying SNAP             | 0.381771713057794   | 0.004356698 |
| Basal Metabolic Rate                       | 0.358242439834419   | 0.005118429 |
| Age At Menarche                            | 1.62211117592782    | 0.005599322 |
| Forced Vital Capacity                      | -0.392373795751726  | 0.006215335 |
| BMI                                        | 0.326494280777879   | 0.014220087 |
| Hand Grip Strength                         | -0.311609113952823  | 0.019090265 |
| Birthweight                                | 0.511073938454779   | 0.019203328 |
| Number of Hours Slept Per Night            | 0.904682488433287   | 0.021581146 |
| Pairs Matching Test Score                  | 0.71928863958202    | 0.028514502 |
| Number of Government Health Advice Ignored | 0.375950761958496   | 0.030303827 |
| Age when left higher education             | -0.357327073405086  | 0.039093313 |
| Mental Health Score                        | 0.303323689959939   | 0.046395222 |
| Hearing Left                               | 0.417263493960358   | 0.060192985 |
| Systolic Blood Pressure                    | 0.837225651515229   | 0.076127705 |
| Diastolic Blood Pressure                   | 0.25130483232228    | 0.086317433 |
| Bone Mineral Density                       | 0.213679010137385   | 0.122432571 |
| Hearing Right                              | 0.710200126988719   | 0.125452515 |
| WHR corrected for BMI                      | -0.180971453265608  | 0.160369302 |

**Supplementary Table 11:** Top UK Biobank traits association – 1q21.1 Duplication

| Chr | Start (Mb) | End (Mb) | Genes         | CNV beta | CNV – P-value | SNP         | Nearest gene | SNP – P-value |
|-----|------------|----------|---------------|----------|---------------|-------------|--------------|---------------|
| 11  | 26.97      | 27.19    | FIBIN – BBOX1 | 0.38     | 1.50E-06      | rs138273386 | FIBIN        | 5.79E-12      |

**Supplementary Table 12:** Exome SNPs associated with height. The SNP comes from a GIANT-exome study on height (Marouli et al. 2017) including 381,625 individuals. (Human genome build 36)

| Pheno                                      | Beta (Inverse Norm) | P           |
|--------------------------------------------|---------------------|-------------|
| Bone Mineral Density                       | 2.5937508362453     | 0.009804329 |
| Townsend Deprivation Index                 | -1.14323622381117   | 0.011617731 |
| Age when left higher education             | -0.942196492847463  | 0.038182179 |
| Hearing Right                              | -1.58214258999308   | 0.044129454 |
| Reaction Time when Paying SNAP             | -0.596752588357782  | 0.117216709 |
| Hand Grip Strength                         | 0.551083090367888   | 0.126981314 |
| Age At Menarche                            | -0.774216818738854  | 0.138082171 |
| General Happiness Score                    | 42.9671566783249    | 0.165456672 |
| Height                                     | -1.35358929756997   | 0.177712004 |
| Income Category                            | -0.77680692429136   | 0.185088056 |
| Pairs Matching Test Score                  | -1.303907968215     | 0.194157299 |
| Birthweight                                | -1.30762895069462   | 0.194503651 |
| Number of Depression Episodes              | 1.51147620435941    | 0.216405206 |
| Systolic Blood Pressure                    | -0.460878088491214  | 0.225718408 |
| Basal Metabolic Rate                       | 0.537022600631399   | 0.235915959 |
| BMI                                        | 1.18694196140479    | 0.237252814 |
| Bodyfat Percentage                         | 1.1623343872493     | 0.247135329 |
| Fluid Intelligence Test Score              | 33.367868574876     | 0.281619632 |
| Forced Expiratory Volume                   | -0.427819714080169  | 0.300924933 |
| Mental Health Score                        | -0.999879807230626  | 0.319716683 |
| Diastolic Blood Pressure                   | -0.377313002867347  | 0.321295215 |
| WHR corrected for BMI                      | -0.355653121189768  | 0.389310308 |
| Waist Circumference                        | 0.853417840972687   | 0.395436814 |
| Hearing Left                               | 0.54223103946467    | 0.490424197 |
| Number of Hours Slept Per Night            | -0.376099142160308  | 0.520786991 |
| Forced Vital Capacity                      | 0.3720465161274     | 0.525652856 |
| Number of Government Health Advice Ignored | -0.311022413453132  | 0.536978353 |

**Supplementary Table 13:** Top UK Biobank traits association – *FIBIN BBOX1* Deletion

| Pheno                                      | Beta (Inverse Norm) | P           |
|--------------------------------------------|---------------------|-------------|
| Bone Mineral Density                       | -1.2518564188802    | 0.004182866 |
| Townsend Deprivation Index                 | 1.00253197304022    | 0.020692661 |
| General Happiness Score                    | -2.67385086771405   | 0.025387429 |
| Hearing Left                               | 2.31915122106899    | 0.028158145 |
| Hand Grip Strength                         | -1.71031418696307   | 0.056172163 |
| Pairs Matching Test Score                  | 1.13402076987003    | 0.057561141 |
| BMI                                        | 0.819367381913949   | 0.060829566 |
| Income Category                            | -0.814611096828761  | 0.07486036  |
| Number of Hours Slept Per Night            | 1.57859623037423    | 0.077959147 |
| Number of Depression Episodes              | 4.8565312910675     | 0.091357239 |
| Basal Metabolic Rate                       | 0.701564061956028   | 0.108464159 |
| Age when left higher education             | -0.717055639700312  | 0.125483647 |
| Bodyfat Percentage                         | 0.617617553997329   | 0.157636346 |
| Number of Government Health Advice Ignored | 0.936985425598994   | 0.158323287 |
| Waist Circumference                        | 0.600482230168807   | 0.169461931 |
| Reaction Time when Paying SNAP             | 1.99284560746826    | 0.181329914 |
| Mental Health Score                        | -0.624692928858386  | 0.254677738 |
| Height                                     | 1.59394428485759    | 0.284997425 |
| WHR corrected for BMI                      | 0.581842308240391   | 0.287882169 |
| Forced Vital Capacity                      | -0.530367531543982  | 0.291322609 |
| Systolic Blood Pressure                    | 0.451437099887695   | 0.298756283 |
| Forced Expiratory Volume                   | 1.51844030911441    | 0.308460006 |
| Birthweight                                | 1.48822730493224    | 0.320048761 |
| Diastolic Blood Pressure                   | -0.539023380526832  | 0.3248363   |
| Fluid Intelligence Test Score              | -1.41907796512982   | 0.341398854 |
| Age At Menarche                            | -0.597002347783648  | 0.400048963 |
| Hearing Right                              | 0.983083684034577   | 0.509987615 |

**Supplementary Table 14:** Top UK Biobank traits association – *FIBIN BBOX1* Duplication



| Pheno                                      | Beta (Inverse Norm) | P           |
|--------------------------------------------|---------------------|-------------|
| BMI                                        | 1.2874568398926     | 9.09543E-09 |
| Bodyfat Percentage                         | 1.19669540028498    | 1.80723E-07 |
| Waist Circumference                        | 1.12936386539182    | 4.62515E-07 |
| Basal Metabolic Rate                       | 1.11872506188444    | 1.07066E-06 |
| Birthweight                                | 1.0889969382322     | 0.000180804 |
| Bone Mineral Density                       | 0.820732787819288   | 0.001272584 |
| General Happiness Score                    | 0.717575954702981   | 0.056187526 |
| Height                                     | 0.433500182384755   | 0.063579354 |
| Age At Menarche                            | -0.723242051679829  | 0.068197977 |
| Income Category                            | -0.425059622481287  | 0.072286296 |
| Reaction Time when Paying SNAP             | -0.323507526314869  | 0.103007979 |
| Fluid Intelligence Test Score              | 0.582796370984299   | 0.117897265 |
| Mental Health Score                        | 0.334578548562066   | 0.141846673 |
| Forced Expiratory Volume                   | -0.311899582017326  | 0.160578482 |
| Hearing Left                               | 0.501045606262624   | 0.182694054 |
| Number of Depression Episodes              | -0.735141042291542  | 0.183581979 |
| Hearing Right                              | 0.520201677930546   | 0.215134471 |
| Forced Vital Capacity                      | -0.385197413130512  | 0.218966361 |
| Systolic Blood Pressure                    | -0.280176574115318  | 0.247185936 |
| Hand Grip Strength                         | 0.258859793094818   | 0.284771709 |
| Number of Hours Slept Per Night            | 0.19356321004384    | 0.39456631  |
| Age when left higher education             | -0.205421416112299  | 0.403756987 |
| Number of Government Health Advice Ignored | 0.174898540037099   | 0.461449941 |
| Diastolic Blood Pressure                   | 0.152498877143301   | 0.496054025 |
| Pairs Matching Test Score                  | -0.135445929659218  | 0.521072579 |
| WHR corrected for BMI                      | -0.14621047724507   | 0.532733176 |
| Townsend Deprivation Index                 | -0.113209825207801  | 0.567671383 |

**Supplementary Table 15:** Top UK Biobank traits association – *MC4R* region Deletion

| Pheno                                      | Beta (Inverse Norm) | P           |
|--------------------------------------------|---------------------|-------------|
| Age At Menarche                            | -1.52408194989415   | 0.009194486 |
| Mental Health Score                        | -1.01136436856113   | 0.066043956 |
| Number of Government Health Advice Ignored | -1.17967569648827   | 0.081571041 |
| Townsend Deprivation Index                 | 0.720526268963964   | 0.082349696 |
| Hearing Left                               | -1.06951503626029   | 0.083094371 |
| Age when left higher education             | -1.13956132894036   | 0.086947419 |
| General Happiness Score                    | -1.12565046553978   | 0.115010119 |
| Height                                     | -1.01379497440273   | 0.131819416 |
| Hand Grip Strength                         | -0.622717399977821  | 0.134586732 |
| Forced Vital Capacity                      | -0.713409631408813  | 0.140821806 |
| Bone Mineral Density                       | 0.644011148828381   | 0.182066272 |
| Systolic Blood Pressure                    | 0.634213131009606   | 0.18367113  |
| Pairs Matching Test Score                  | -0.721494928015646  | 0.185473324 |
| WHR corrected for BMI                      | -0.877334317041033  | 0.194516555 |
| Number of Hours Slept Per Night            | -0.524177543915688  | 0.207846184 |
| Forced Expiratory Volume                   | 0.695607882422717   | 0.214354592 |
| Fluid Intelligence Test Score              | -0.866635721012498  | 0.215707417 |
| BMI                                        | 0.508298099228124   | 0.220392978 |
| Waist Circumference                        | 0.668894608084148   | 0.269674797 |
| Bodyfat Percentage                         | 0.639446287922858   | 0.291381921 |
| Diastolic Blood Pressure                   | -0.690656787408137  | 0.300094057 |
| Basal Metabolic Rate                       | -0.631314922998035  | 0.350561941 |
| Reaction Time when Paying SNAP             | 0.498371636280979   | 0.410850025 |
| Income Category                            | 0.750733066081982   | 0.431294166 |
| Birthweight                                | 0.401501790074529   | 0.468374974 |
| Hearing Right                              | 0.483092369068406   | 0.499133365 |
| Number of Depression Episodes              | -1.79377681681671   | 0.682913626 |

**Supplementary Table 16:** Top UK Biobank traits association – *MC4R* region Duplication

| Pheno                                      | Beta (Inverse Norm) | P           |
|--------------------------------------------|---------------------|-------------|
| Hand Grip Strength                         | -2.8545618662096    | 0.001395612 |
| Waist Circumference                        | -2.90268450847608   | 0.002635523 |
| Basal Metabolic Rate                       | -2.72820033090958   | 0.005194172 |
| Pairs Matching Test Score                  | 2.30936389124103    | 0.010058217 |
| Mental Health Score                        | -23.7440918114016   | 0.014350028 |
| BMI                                        | -2.29787816482944   | 0.019911956 |
| Hearing Left                               | -8.24091356965084   | 0.022470974 |
| Age At Menarche                            | -4.67100076509518   | 0.037480058 |
| Fluid Intelligence Test Score              | -24.9761568282883   | 0.038346408 |
| WHR corrected for BMI                      | -1.78775586552194   | 0.038818777 |
| Forced Vital Capacity                      | -12.0506811878732   | 0.051771394 |
| General Happiness Score                    | -22.4366865701911   | 0.062709251 |
| Bodyfat Percentage                         | -1.72958442502477   | 0.064630398 |
| Reaction Time when Paying SNAP             | 1.80926815373641    | 0.070102942 |
| Height                                     | -1.68778752534211   | 0.071344816 |
| Hearing Right                              | -20.9194200406331   | 0.08281571  |
| Bone Mineral Density                       | -1.46124015965162   | 0.108724245 |
| Forced Expiratory Volume                   | -9.1225041093684    | 0.140910225 |
| Number of Hours Slept Per Night            | 1.34254866919566    | 0.174082628 |
| Number of Government Health Advice Ignored | 7.01274828568291    | 0.217177372 |
| Number of Depression Episodes              | 7.02702202169166    | 0.231069631 |
| Income Category                            | -2.94538127227924   | 0.264974597 |
| Diastolic Blood Pressure                   | 1.03200285751648    | 0.265084501 |
| Systolic Blood Pressure                    | 1.00884051698689    | 0.275956966 |
| Birthweight                                | 0.784791202736823   | 0.433020341 |
| Townsend Deprivation Index                 | 0.524875148815789   | 0.575618025 |
| Age when left higher education             | -3.07790340913797   | 0.639012578 |

**Supplementary Table 17:** Top UK Biobank traits association – *7q11.23* Deletion

| Pheno                                      | Beta (Inverse Norm) | P           |
|--------------------------------------------|---------------------|-------------|
| Age At Menarche                            | 2.20965127532717    | 0.001146906 |
| Income Category                            | -1.50125456532932   | 0.00186953  |
| Waist Circumference                        | 1.21000431247876    | 0.005291168 |
| Bone Mineral Density                       | 1.20024687860349    | 0.00750692  |
| Pairs Matching Test Score                  | 1.0928911716104     | 0.014254486 |
| Mental Health Score                        | -1.7853000842924    | 0.015348088 |
| Bodyfat Percentage                         | 1.31988778399257    | 0.016876324 |
| Number of Hours Slept Per Night            | 2.35182848663618    | 0.018324348 |
| Basal Metabolic Rate                       | 0.987636664948835   | 0.022845288 |
| Townsend Deprivation Index                 | 0.954896300419198   | 0.029755281 |
| BMI                                        | 0.924527783774362   | 0.033109819 |
| Fluid Intelligence Test Score              | -1.97286735976472   | 0.042864193 |
| Hand Grip Strength                         | -0.811254657712104  | 0.050289493 |
| Birthweight                                | 16.0005667897666    | 0.051923223 |
| WHR corrected for BMI                      | 1.79120205329927    | 0.072391569 |
| Forced Vital Capacity                      | -0.920892990328037  | 0.084474224 |
| Forced Expiratory Volume                   | -0.831377462056381  | 0.104897533 |
| Reaction Time when Paying SNAP             | 0.874159855528507   | 0.131746108 |
| Height                                     | 1.4556315147367     | 0.147342702 |
| Age when left higher education             | -1.33366005384998   | 0.185399958 |
| General Happiness Score                    | -1.15041668902804   | 0.23757211  |
| Hearing Left                               | 1.14716244267823    | 0.245769314 |
| Systolic Blood Pressure                    | -1.16205345677092   | 0.247364504 |
| Number of Government Health Advice Ignored | 0.68264479885369    | 0.304033655 |
| Number of Depression Episodes              | 3.19765812268875    | 0.383616708 |
| Diastolic Blood Pressure                   | -0.853834204402192  | 0.395358421 |
| Hearing Right                              | 0.686427133587193   | 0.453989729 |

**Supplementary Table 18:** Top UK Biobank traits association – 7q11.23 Duplication

| Pheno                                      | Beta (Inverse Norm) | P           |
|--------------------------------------------|---------------------|-------------|
| Height                                     | -2.13405418437534   | 1.90485E-06 |
| Hand Grip Strength                         | -1.35166355822425   | 0.001070424 |
| Diastolic Blood Pressure                   | 1.21468233563065    | 0.001670664 |
| Reaction Time when Paying SNAP             | 1.34872737506186    | 0.002657316 |
| Income Category                            | -1.15604158149114   | 0.002749175 |
| Systolic Blood Pressure                    | 1.12716788778251    | 0.003535866 |
| Forced Vital Capacity                      | -1.43006145018152   | 0.005007003 |
| Basal Metabolic Rate                       | -1.2516395152016    | 0.005213666 |
| Fluid Intelligence Test Score              | -16.9406418460931   | 0.005243192 |
| Townsend Deprivation Index                 | 1.03058485645565    | 0.00765606  |
| BMI                                        | 1.87702927175826    | 0.008247308 |
| Pairs Matching Test Score                  | 2.4463918984338     | 0.014142737 |
| Forced Expiratory Volume                   | -0.922740797461663  | 0.014863071 |
| Bone Mineral Density                       | -0.840159320251297  | 0.042028947 |
| Waist Circumference                        | 1.39952278981851    | 0.048868914 |
| Number of Government Health Advice Ignored | 1.37619112343831    | 0.051368882 |
| Age when left higher education             | -1.39644398158938   | 0.056004153 |
| Age At Menarche                            | 8.97838295561091    | 0.082394659 |
| Number of Hours Slept Per Night            | 0.666862746119331   | 0.084533111 |
| General Happiness Score                    | -9.97378898190988   | 0.100152169 |
| Mental Health Score                        | 0.829112550042091   | 0.1035549   |
| Hearing Left                               | -9.3107662558719    | 0.125096902 |
| Number of Depression Episodes              | -1.41074439667684   | 0.167706596 |
| Bodyfat Percentage                         | 0.962503474163049   | 0.175547548 |
| WHR corrected for BMI                      | 0.453565011379178   | 0.239875659 |
| Birthweight                                | -0.647577000615058  | 0.362791636 |
| Hearing Right                              | 0.914229998839443   | 0.364650301 |

**Supplementary Table 19:** Top UK Biobank traits association – 3q29 section 1 Deletion

| Pheno                                      | Beta (Inverse Norm) | P           |
|--------------------------------------------|---------------------|-------------|
| Basal Metabolic Rate                       | 1.55374163087194    | 0.000124379 |
| Bodyfat Percentage                         | 1.56085173791293    | 0.00024266  |
| BMI                                        | 1.54686115909051    | 0.000386123 |
| Waist Circumference                        | 0.676959996957612   | 0.001070605 |
| Diastolic Blood Pressure                   | 1.98568445601969    | 0.001333407 |
| Systolic Blood Pressure                    | 1.93735804839957    | 0.00174417  |
| Hand Grip Strength                         | -1.70982150012345   | 0.011127322 |
| Hearing Right                              | -10.8457823086025   | 0.01262258  |
| Forced Expiratory Volume                   | -0.519788041016521  | 0.018199421 |
| Mental Health Score                        | 1.50116456033249    | 0.025895226 |
| WHR corrected for BMI                      | 1.29603936024737    | 0.036239951 |
| Townsend Deprivation Index                 | 0.601000046460346   | 0.036635776 |
| Forced Vital Capacity                      | -0.456779793836993  | 0.037961296 |
| Number of Depression Episodes              | 1.1788388067718     | 0.040680706 |
| Birthweight                                | 1.12684448049525    | 0.050198825 |
| Hearing Left                               | 1.6464372082718     | 0.072225582 |
| Bone Mineral Density                       | 0.753459413285597   | 0.072686491 |
| Number of Government Health Advice Ignored | -1.25563668862448   | 0.073460416 |
| Pairs Matching Test Score                  | -1.23291508793158   | 0.075622202 |
| Age when left higher education             | -0.624514896895656  | 0.096543046 |
| Income Category                            | -0.715142630318031  | 0.10592283  |
| Number of Hours Slept Per Night            | 0.995201459157869   | 0.139498291 |
| Height                                     | 0.397530627221239   | 0.166882727 |
| Age At Menarche                            | 2.87098713003968    | 0.206101039 |
| Reaction Time when Paying SNAP             | -0.448962616514866  | 0.234301481 |
| General Happiness Score                    | 1.06589886357795    | 0.243267086 |
| Fluid Intelligence Test Score              | 3.63316950620201    | 0.403219797 |

**Supplementary Table 20:** Top UK Biobank traits association – 3q29 section 1 Duplication

| Pheno                                      | Beta (Inverse Norm) | P           |
|--------------------------------------------|---------------------|-------------|
| Height                                     | -2.13405418437534   | 1.90485E-06 |
| Hand Grip Strength                         | -1.35166355822425   | 0.001070424 |
| Diastolic Blood Pressure                   | 1.21468233563065    | 0.001670664 |
| Reaction Time when Paying SNAP             | 1.34872737506186    | 0.002657316 |
| Income Category                            | -1.15604158149114   | 0.002749175 |
| Systolic Blood Pressure                    | 1.12716788778251    | 0.003535866 |
| Forced Vital Capacity                      | -1.43006145018152   | 0.005007003 |
| Basal Metabolic Rate                       | -1.2516395152016    | 0.005213666 |
| Fluid Intelligence Test Score              | -16.9406418460931   | 0.005243192 |
| Townsend Deprivation Index                 | 1.03058485645565    | 0.00765606  |
| BMI                                        | 1.87702927175826    | 0.008247308 |
| Pairs Matching Test Score                  | 2.4463918984338     | 0.014142737 |
| Forced Expiratory Volume                   | -0.922740797461663  | 0.014863071 |
| Bone Mineral Density                       | -0.840159320251297  | 0.042028947 |
| Waist Circumference                        | 1.39952278981851    | 0.048868914 |
| Number of Government Health Advice Ignored | 1.37619112343831    | 0.051368882 |
| Age when left higher education             | -1.39644398158938   | 0.056004153 |
| Age At Menarche                            | 8.97838295561091    | 0.082394659 |
| Number of Hours Slept Per Night            | 0.666862746119331   | 0.084533111 |
| General Happiness Score                    | -9.97378898190988   | 0.100152169 |
| Mental Health Score                        | 0.829112550042091   | 0.1035549   |
| Hearing Left                               | -9.3107662558719    | 0.125096902 |
| Number of Depression Episodes              | -1.41074439667684   | 0.167706596 |
| Bodyfat Percentage                         | 0.962503474163049   | 0.175547548 |
| WHR corrected for BMI                      | 0.453565011379178   | 0.239875659 |
| Birthweight                                | -0.647577000615058  | 0.362791636 |
| Hearing Right                              | 0.914229998839443   | 0.364650301 |

**Supplementary Table 21:** Top UK Biobank traits association – 3q29 section 2 Deletion

| Pheno                                      | Beta (Inverse Norm) | P           |
|--------------------------------------------|---------------------|-------------|
| Diastolic Blood Pressure                   | 2.00936179939125    | 0.000290132 |
| Basal Metabolic Rate                       | 1.10301630979139    | 0.002389257 |
| Waist Circumference                        | 1.54316710351228    | 0.00542729  |
| Systolic Blood Pressure                    | 8.15924003735672    | 0.011690594 |
| Bone Mineral Density                       | -1.27853929331454   | 0.014338158 |
| Number of Government Health Advice Ignored | -1.09264447363499   | 0.016472923 |
| Hand Grip Strength                         | -1.48777181144305   | 0.018203532 |
| BMI                                        | 1.27444223823957    | 0.021660825 |
| Number of Hours Slept Per Night            | 1.1611376044648     | 0.026151361 |
| Height                                     | 0.78610418934282    | 0.029648874 |
| Income Category                            | 1.68078859745574    | 0.030251929 |
| Reaction Time when Paying SNAP             | 1.31388106070481    | 0.032353607 |
| Forced Expiratory Volume                   | -1.31799180947328   | 0.033152824 |
| Mental Health Score                        | 0.749675388606364   | 0.0367163   |
| Bodyfat Percentage                         | -1.32802667675714   | 0.037962075 |
| Pairs Matching Test Score                  | 1.14607415659259    | 0.038465766 |
| Birthweight                                | -2.7555498713919    | 0.047030885 |
| Forced Vital Capacity                      | -1.19176807900792   | 0.054077371 |
| Townsend Deprivation Index                 | 0.995203100582651   | 0.056623952 |
| Age when left higher education             | 1.08649611123387    | 0.078928239 |
| General Happiness Score                    | 1.84338405251725    | 0.079337401 |
| Age At Menarche                            | 5.55447684553796    | 0.13932996  |
| Number of Depression Episodes              | -1.12725598766506   | 0.15442902  |
| WHR corrected for BMI                      | -0.767022947485931  | 0.165976711 |
| Hearing Right                              | -1.23765068111656   | 0.239098205 |
| Hearing Left                               | 0.893383985809885   | 0.244112848 |
| Fluid Intelligence Test Score              | 0.775849736785917   | 0.2578305   |

**Supplementary Table 22:** Top UK Biobank traits association – 3q29 section 2 Duplication



| Chr | Start (Mb) [hg18] | End (Mb) [hg18] | Frequency (%) |      | BMI     |          |       | Weight  |          |       | Height  |          |       |
|-----|-------------------|-----------------|---------------|------|---------|----------|-------|---------|----------|-------|---------|----------|-------|
|     |                   |                 | Del           | Dup  | $\beta$ | P value  | $r^2$ | $\beta$ | P value  | $r^2$ | $\beta$ | P value  | $r^2$ |
| 2   | 111.3             | 111.5           | 0.01          | 0.02 | -       | -        | -     | -8.97   | 1.33E-05 | 1.00  | -       | -        | -     |
| 2   | 112.4             | 112.5           | 0.03          | 0.03 | -       | -        | -     | -8.77   | 1.74E-05 | 1.00  | -       | -        | -     |
| 15  | 20.33             | 20.6            | 0.38          | 0.48 | -       | -        | -     | -       | -        | -     | 0.74    | 8.10E-06 | 0.95  |
| 22  | 17.41             | 18.69           | 0.02          | 0.06 | 2.11    | 1.70E-05 | 0.96  | -       | -        | -     | -       | -        | -     |
| 22  | 19.07             | 19.33           | 0.01          | 0.08 | 1.85    | 3.82E-06 | 1.00  | -       | -        | -     | -       | -        | -     |

**Supplementary Table 23:** CNVs associated with one or several of the traits of interest and with a p-value close to the significance level. The first one corresponds to two CNVs in the 2q13 region (111.3-111.5Mb – 112.4-112.5Mb), and whose copy number is negatively associated with weight (section 1: Beta=-8.97kg, P=1.3x10<sup>-5</sup> – section 2: Beta=-8.77kg, P=1.7x10<sup>-5</sup>). Larger (1.5-2 Mb) CNVs encompassing this region have been reported in the literature<sup>6</sup> for risk increase of developmental delay<sup>7,8</sup>. The second one is located between the 15q11.2 BP1 and BP2<sup>9,10</sup> (20.33-20.60Mb) and is associated with height (Beta=0.74cm – P=8.1x10<sup>-6</sup>). It corresponds exactly to the region responsible for the Burnside-Butler syndrome<sup>9</sup>, in the proximal interval of Prader-Willi/Angelman. Moreover, it was also found associated with schizophrenia<sup>11</sup>. Finally, two CNVs located in the 22q11.2 region (17.41-18.69Mb and 19.07-19.33Mb) were found to be associated to BMI in our meta-analysis (Beta=2.11kg/m<sup>2</sup> (P=1.7x10<sup>-5</sup>) and Beta=1.85kg/m<sup>2</sup> (P=3.82x10<sup>-6</sup>), respectively). They overlap with the location of Di George/22q11.21 duplication syndrome (17.40-19.75Mb)<sup>12,13</sup> with a wide phenotype spectrum. Recently, the deletion, was associated with schizophrenia<sup>11</sup>.

| Pheno | SNPs       | CHR | GENE     | min_P_Neff  | beta_min     | Rsq_min     |
|-------|------------|-----|----------|-------------|--------------|-------------|
| BMI   | rs3888190  | 16  | ATP2A1   | 0.000189136 | -3.07196299  | 0.756916339 |
| BMI   | rs4787491  | 16  | INO80E   | 5.38E-09    | -3.662497866 | 0.995571108 |
| BMI   | rs6567160  | 18  | MC4R     | 0.00064438  | -5.061863809 | 0.92382604  |
| HT    | rs6658763  | 1   | FMO5     | 4.49E-06    | 3.459918459  | 0.933499023 |
| HT    | rs11642612 | 16  | FLJ25404 | 3.39E-10    | 5.211022089  | 0.991528719 |

**Supplementary Table 24:** CNV association meta-analysis results for known CNVs

| Pheno | chr | start    | end      | P value  | Beta         | F del (%) | F dup (%) | R square    |
|-------|-----|----------|----------|----------|--------------|-----------|-----------|-------------|
| BMI   | 16  | 28700000 | 28900000 | 2.32E-05 | -3.07196299  | 0.024     | 0.041     | 0.756916339 |
| BMI   | 16  | 29514353 | 30107356 | 2.39E-09 | -3.662497866 | 0.023     | 0.026     | 0.995571108 |
| WT    | 16  | 28700000 | 28900000 | 2.19E-06 | -10.3514665  | 0.019     | 0.029     | 0.935360019 |

**Supplementary Table 25:** CNV association meta-analysis results for known SNPs

| chr                        | start | end   | Beta BMI |      |      | Beta WT |       |       | Beta HT |      |      | Beta WHR |       |       | OR SCZ |       |
|----------------------------|-------|-------|----------|------|------|---------|-------|-------|---------|------|------|----------|-------|-------|--------|-------|
|                            |       |       | mirror   | del  | dup  | mirror  | del   | dup   | mirror  | del  | dup  | mirror   | del   | dup   | del    | dup   |
| 1                          | 145   | 145.9 |          |      |      | 6.66    | -9.66 | 6.27  | 3.46    | -    |      |          |       |       |        | 3.80  |
| 3                          | 197.7 | 197.9 |          |      |      | 22.55   |       | 24.14 |         |      |      |          |       |       |        | INF   |
| 3                          | 198.2 | 198.4 |          |      |      |         |       |       | 13.3    |      |      |          |       |       |        |       |
| 7                          | 72.66 | 72.75 |          |      |      |         |       |       |         |      |      | 0.111    |       | 0.104 |        | 16.10 |
| 16                         | 28.73 | 28.95 | -3.07    | 5.16 |      | -10.35  | 14.57 | -8.01 |         |      |      |          |       |       | 20.60  |       |
| 16                         | 29.5  | 30.11 | -3.66    | 6.15 |      |         |       |       | 0.82    | 1.31 | 0.54 | -0.041   | 0.092 |       |        | 9.40  |
| Close to significance CNVs |       |       |          |      |      |         |       |       |         |      |      |          |       |       |        |       |
| 15                         | 20.33 | 20.62 |          |      |      |         |       |       | 0.74    | 1.49 |      |          |       |       |        | 1.80  |
| 22                         | 17.41 | 18.69 | 2.11     |      | 2.05 | 5.01    |       | 5.09  |         |      |      |          |       |       | 67.70  | 0.15  |
| 22                         | 19.07 | 19.33 | 1.85     |      | 1.89 | 4.98    |       | 5.28  |         |      |      |          |       |       |        |       |

**Supplementary Table 26:** Significant CNV effects on the traits of interest with on the last column the OR for schizophrenia from the *Marshall et al 2016* paper on association between CNVs and schizophrenia. (human genome build 36)

| Cohort              | Country     | Samples size  |               |               |                 | Reference                                                                                                                                                                                                                                                                                             |
|---------------------|-------------|---------------|---------------|---------------|-----------------|-------------------------------------------------------------------------------------------------------------------------------------------------------------------------------------------------------------------------------------------------------------------------------------------------------|
|                     |             | BMI           | Weight        | Height        | Waist-Hip ratio |                                                                                                                                                                                                                                                                                                       |
| 3D                  | Denmark     | 942           | 959           | 950           |                 | <a href="https://doi.org/10.1177/0333102415570492">https://doi.org/10.1177/0333102415570492</a>                                                                                                                                                                                                       |
| B58C                | UK          | 2334          | 2334          | 2334          | 2334            | <a href="http://www.b58cgenegene.sgu.ac.uk/index.php">http://www.b58cgenegene.sgu.ac.uk/index.php</a>                                                                                                                                                                                                 |
| COROGENE CASE       | Finland     | 1410          | 1417          | 1411          |                 | <a href="http://ije.oxfordjournals.org/content/early/2011/06/02/ije.dvr090.extract">http://ije.oxfordjournals.org/content/early/2011/06/02/ije.dvr090.extract</a>                                                                                                                                     |
| COROGENE CTRL       | Finland     | 1570          | 1578          | 1570          | 1577            | <a href="http://ije.oxfordjournals.org/content/early/2011/06/02/ije.dvr090.extract">http://ije.oxfordjournals.org/content/early/2011/06/02/ije.dvr090.extract</a>                                                                                                                                     |
| DNBC                | Denmark     | 1590          | 1588          | 1612          |                 | <a href="http://www.dnbc.dk/">www.dnbc.dk/</a>                                                                                                                                                                                                                                                        |
| EGCUT               | Estonia     | 7087          | 7087          | 7089          | 6153            | <a href="http://www.biobank.ee">http://www.biobank.ee</a>                                                                                                                                                                                                                                             |
| FAMHS               | US          | 755           | 755           | 755           | 755             | <a href="https://dsgweb.wustl.edu/PROJECTS/MPI.html">https://dsgweb.wustl.edu/PROJECTS/MPI.html</a>                                                                                                                                                                                                   |
| FAMHS1M             | US          | 465           | 465           | 465           | 465             | <a href="https://dsgweb.wustl.edu/PROJECTS/MPI.html">https://dsgweb.wustl.edu/PROJECTS/MPI.html</a>                                                                                                                                                                                                   |
| FINRISK             | Finland     | 13056         | 13068         | 13060         | 13067           | <a href="http://www.ktl.fi/portal/4168">http://www.ktl.fi/portal/4168</a>                                                                                                                                                                                                                             |
| Generation Scotland | UK          | 6390          | 6391          | 6412          | 6329            | <a href="http://www.ed.ac.uk/generation-scotland/">http://www.ed.ac.uk/generation-scotland/</a>                                                                                                                                                                                                       |
| H2000               | Finland     | 1399          | 1400          | 1399          | 1399            | <a href="http://www.terveys2000.fi/indexe.html">http://www.terveys2000.fi/indexe.html</a>                                                                                                                                                                                                             |
| HBCS                | Finland     | 1448          | 1449          | 1448          | 1447            | <a href="http://www.ktl.fi/portal/english/research_people_programs/health_promotion_and_chronic_disease_prevention/units/diabetes_unit/idefix_study/">http://www.ktl.fi/portal/english/research_people_programs/health_promotion_and_chronic_disease_prevention/units/diabetes_unit/idefix_study/</a> |
| Hypergenes          | Italy       | 2930          |               |               |                 | <a href="http://www.hypergenes.eu/">http://www.hypergenes.eu/</a>                                                                                                                                                                                                                                     |
| InCHIANTI           | Italy       | 702           | 706           | 700           | 715             | <a href="http://www.inchiantistudy.net/">http://www.inchiantistudy.net/</a>                                                                                                                                                                                                                           |
| LifeLine            | Netherlands | 11486         |               | 11486         |                 | <a href="http://www.lifelines.nl">http://www.lifelines.nl</a>                                                                                                                                                                                                                                         |
| LLFS                | US          | 476           | 476           | 478           |                 | <a href="https://dsgweb.wustl.edu/llfs/">https://dsgweb.wustl.edu/llfs/</a>                                                                                                                                                                                                                           |
| LOLIPOP             | UK          | 1243          | 1243          | 1243          | 1243            | <a href="http://www.lolipopstudy.org/">http://www.lolipopstudy.org/</a>                                                                                                                                                                                                                               |
| Mt Sinai BioMe      | US          | 1301          | 1233          |               |                 | <a href="http://icahn.mssm.edu/research/ipm/programs/biome-biobank">http://icahn.mssm.edu/research/ipm/programs/biome-biobank</a>                                                                                                                                                                     |
| PREDICTCVD          | Finland     | 1744          | 1757          | 1744          | 1757            | <a href="http://www.ktl.fi/portal/4168">http://www.ktl.fi/portal/4168</a>                                                                                                                                                                                                                             |
| QIMR                | Australia   | 7385          | 7385          | 7419          |                 | <a href="http://www.qimrberghofer.edu.au/">http://www.qimrberghofer.edu.au/</a>                                                                                                                                                                                                                       |
| SCCS                | Switzerland | 750           |               |               |                 | <a href="http://www.gastroenterologie.usz.ch/forschung/hepatologie/seiten/unterseite-3.aspx">http://www.gastroenterologie.usz.ch/forschung/hepatologie/seiten/unterseite-3.aspx</a>                                                                                                                   |
| SSC                 | US          | 701           |               |               |                 | <a href="https://sfari.org/resources/autism-cohorts/simons-simplex-collection">https://sfari.org/resources/autism-cohorts/simons-simplex-collection</a>                                                                                                                                               |
| TRAILSPOP           | Netherlands | 1171          | 1171          | 1173          | 1167            | <a href="http://www.trails.nl/">http://www.trails.nl/</a>                                                                                                                                                                                                                                             |
| TwinsUK             | UK          | 1195          | 1195          | 1195          | 1195            | <a href="http://www.twinsuk.co.uk/">http://www.twinsuk.co.uk/</a>                                                                                                                                                                                                                                     |
| UKBB                | UK          | 119873        | 119767        | 116259        | 119867          | <a href="https://www.ukbiobank.ac.uk/">https://www.ukbiobank.ac.uk/</a>                                                                                                                                                                                                                               |
| YFS                 | Finland     | 1758          | 1759          | 1763          | 1774            | <a href="http://vanha.med.utu.fi/cardio/youngfinnsstudy/">http://vanha.med.utu.fi/cardio/youngfinnsstudy/</a>                                                                                                                                                                                         |
| <b>TOTAL</b>        |             | <b>191161</b> | <b>175183</b> | <b>181965</b> | <b>161244</b>   |                                                                                                                                                                                                                                                                                                       |

**Supplementary Table 27:** List of all the cohorts participating to this meta-analysis.

| Metrics    | Definition                                                                            |
|------------|---------------------------------------------------------------------------------------|
| Confidence | Likelihood of the most likely CN minus the 2nd most likely one                        |
| Length     | CNV length in bp                                                                      |
| N probes   | Number of probes in the CNV                                                           |
| LRR mean   | Mean LRR for a given sample                                                           |
| LRR sd     | Standard deviation of the LRR                                                         |
| BAF mean   | Mean BAF for a given sample                                                           |
| BAF sd     | Standard deviation of the BAF                                                         |
| BAF drift  | Summarize the proportion of BAF values falling out of the expected BAF (0, 0.5 and 1) |
| WF         | Value measuring the strength of waviness in a given sample                            |
| N CNVs     | Number of CNVs per sample                                                             |

**Supplementary Table 28:** List of the quality metrics extracted from PennCNV and used to calculate the CNV quality score.

## Supplementary Notes

### Supplementary Note 1. *Example configuration file to run the CNV-calling pipeline*

```
pennCNVpath: /data/sgg/aurelien/software/pennCNV/penncnv_2
HMMpath: /data/sgg/aurelien/software/pennCNV/penncnv_2/lib/hhall.hmm
HMMcreate: 0
PFB: example/pfb/
CompilePFB: 1
GCmod: my/GC_model/path
UseGCmod: 0
InputData: 1
DATA: example/raw
OUTPUT: example/results
FormattedPath: example/formated
Chromosome: 1-22
CNVcall: 1
Cleancall: 1
format: 1
CreateRfile: 1
AssoData: 1
NbCores: 16
PhenoPath: example/phenotype/phenotype.txt
Phenotype: example
```

### Supplementary Note 2: *Full funding information*

This work was supported by the Leenards Foundation [to Z.K.], the Swiss National Science Foundation [31003A\_169929 to Z.K., Sinergia grant CRSII33-133044 to AR], Simons Foundation [SFARI274424 to AR] and SystemsX.ch [51RTP0\_151019 to Z.K.]. The EGCUT researchers were funded by EU H2020 grant #692145, #692065, Estonian Research Council Grant IUT20-60, IUT24-6, and European Union through the European Regional Development Fund Project No. 2014-2020.4.01.15-0012 GENTRANSMED. KM is a Jacobs Foundation Research Fellow. A.R.W., H.Y. and T.M.F. are supported by the European Research Council grant: 323195:SZ-245. M.A.T., M.N.W. and A.M. are supported by the Wellcome Trust Institutional Strategic Support Award(WT097835MF). R.B. is funded by the Wellcome Trust and Royal Society grant:104150/Z/14/Z. S.E.J. is funded by the Medical Research Council (grant:MR/M005070/1). R.M.F. is a Sir Henry Dale Fellow (Wellcome Trust and Royal Society grant: 104150/Z/14/Z). J.T is funded by a Diabetes Research and Wellness Foundation Fellowship. Finrisk study was supported by the Academy of Finland (grant numbers 139635,

129494, 129322, 250207, 136895 and 263836), the Finnish Foundation for Cardiovascular Research, and the Sigrid Jusélius Foundation. I.M.H was supported by the BMBF-01ER1206, BMBF-01ER1507. COROGENE was supported by grants from Helsinki University Central Hospital special government funds (EVO #TYH7215, #TKK2012005, #TYH2012209, #TYH2014312), and Finnish Foundation for Cardiovascular research. The EU FP7 under grant agreements nr. 313010 (BBMRI-LPC), nr. 305280 (MIMOmics), and HZ2020 633589 (Ageing with Elegans), The Finnish Academy grant no. 269517, The Yrjö Jahnsson Foundation. M.D.T was supported by the MRC fellowships: G0501942 and G0902313. This article presents independent research funded partially by the National Institute for Health Research (NIHR) The views expressed are those of the author(s) and not necessarily those of the NHS, the NIHR or the UK Department of Health. We acknowledge use of phenotype and genotype data from the British 1958 Birth Cohort DNA collection, funded by the Medical Research Council grant G0000934 and the Wellcome Trust grant 068545/Z/02. Genotyping for the B58C-WTCCC subset was funded by the Wellcome Trust grant 076113/B/04/Z. The B58C-T1DGC genotyping utilized resources provided by the Type 1 Diabetes Genetics Consortium, a collaborative clinical study sponsored by the National Institute of Diabetes and Digestive and Kidney Diseases (NIDDK), National Institute of Allergy and Infectious Diseases (NIAID), National Human Genome Research Institute (NHGRI), National Institute of Child Health and Human Development (NICHD), and Juvenile Diabetes Research Foundation International (JDRF) and supported by U01 DK062418. B58C-T1DGC GWAS data were deposited by the Diabetes and Inflammation Laboratory, Cambridge Institute for Medical Research (CIMR), University of Cambridge, which is funded by Juvenile Diabetes Research Foundation International, the Wellcome Trust and the National Institute for Health Research Cambridge Biomedical Research Centre; the CIMR is in receipt of a Wellcome Trust Strategic Award (079895). The B58C-GABRIEL genotyping was supported by a contract from the European Commission Framework Programme 6 (018996) and grants from the French Ministry of Research. The Young Finns Study has been financially supported by the Academy of Finland: grants 286284, 134309 (Eye), 126925, 121584, 124282, 129378 (Salve), 117787 (Gendi), and 41071 (Skidi); the Social Insurance Institution of Finland; Kuopio, Tampere and Turku University Hospital Medical Funds (grant X51001); Juho Vainio Foundation; Paavo Nurmi Foundation; Finnish Foundation of Cardiovascular Research ; Finnish Cultural Foundation; Tampere Tuberculosis Foundation; Emil Aaltonen Foundation; Yrjö Jahnsson Foundation; and

Signe and Ane Gyllenberg Foundation. The expert technical assistance in the statistical analyses by Irina Lisinen is gratefully acknowledged. XL is supported by the Nordic Center of Excellence in Health-Related e-Sciences. The Danish National Biobank is supported by the Novo Nordisk Foundation. The study was partly based on samples from the Danish National Birth Cohort, which was established with the support of a major grant from the Danish National Research Foundation with additional support from the Danish Pharmacists' Fund, the Egmont Foundation, the March of Dimes Birth Defects Foundation, the Augustinus Foundation and the Health Fund of the Danish Health Insurance Societies. BF was supported by an Oak Foundation fellowship. This study was supported by the National Health and Medical Research Council of Australia [grant numbers 403981, 1021105, 003209, 82893, and 572613] and the Canadian Institutes of Health Research [grant number MOP-82893]. The authors gratefully acknowledge the following institutes for providing funding for Core Management of the Raine Study: The University of Western Australia (UWA), Curtin University, the Raine Medical Research Foundation, the UWA Faculty of Medicine, Dentistry and Health Sciences, the Telethon Kids Institute, the Women and Infants Research Foundation and Edith Cowan University. This work was supported by resources provided by the Pawsey Supercomputing Centre with funding from the Australian Government and Government of Western Australia. The LOLIPOP study is supported by the National Institute for Health Research (NIHR) Comprehensive Biomedical Research Centre Imperial College Healthcare NHS Trust, the British Heart Foundation (SP/04/002), the Medical Research Council (G0601966,G0700931), the Wellcome Trust (084723/Z/08/Z), the NIHR (RP-PG-0407-10371), European Union FP7 (EpiMigrant, 279143) and Action on Hearing Loss (G51). TRAILS has been financially supported by various grants from the Netherlands Organization for Scientific Research NWO (Medical Research Council program grant GB-MW 940-38-011; ZonMW Brainpower grant 100-001-004; ZonMw Risk Behavior and Dependence grants 60-60600-97-118; ZonMw Culture and Health grant 261-98-710; Social Sciences Council medium-sized investment grants GB-MaGW 480-01-006 and GB-MaGW 480-07-001; Social Sciences Council project grants GB-MaGW 452-04-314 and GB-MaGW 452-06-004; NWO large-sized investment grant 175.010.2003.005; NWO Longitudinal Survey and Panel Funding 481-08-013), the Dutch Ministry of Justice (WODC), the European Science Foundation (EuroSTRESS project FP-006), Biobanking and Biomolecular Resources Research Infrastructure BBMRI-NL (CP 32), and the participating universities. Statistical analyses were

carried out on the Genetic Cluster Computer (<http://www.geneticcluster.org>) hosted by SURFsara and financially supported by the Netherlands Scientific Organization (NWO 480-05-003 PI: Posthuma) along with a supplement from the Dutch Brain Foundation and the VU University Amsterdam. 3D has been supported by the LuF Grant number: R155-2014-1724. InCHIANTI has been supported by the Wellcome Trust Institutional Strategic Support Award(WT097835MF). QIMR was supported by the Australian National Health and Medical Research Council (NHMRC grants 241944, 339446, 389875, 389891, 389892, 389938, 442915, 442981, 496739, 496688, 552485, 613672, 613674, 619667, 1049472, 1050208, 1075175, 1078399), the U.S. National Institute of Health (grants AA07535, AA10248, AA014041, AA13320, AA13321, AA13326 and DA12854) and the Australian Research Council (ARC grant DP0770096). FamHS was supported by NIDDK-R01DK089256, NHLBI-R01HL117078. LLFS was supported by NIA-U01AG023746. The KORA study was initiated and financed by the Helmholtz Zentrum München – German Research Center for Environmental Health, which is funded by the German Federal Ministry of Education and Research (BMBF) and by the State of Bavaria. Furthermore, KORA research was supported within the Munich Center of Health Sciences (MC-Health), Ludwig-Maximilians-Universität, as part of LMUinnovativ.



## Supplementary References

1. Locke, A.E. *et al.* Genetic studies of body mass index yield new insights for obesity biology. *Nature* **518**, 197-206 (2015).
2. Wood, A.R. *et al.* Defining the role of common variation in the genomic and biological architecture of adult human height. *Nat Genet* **46**, 1173-86 (2014).
3. Peterson, R.E. *et al.* On the association of common and rare genetic variation influencing body mass index: a combined SNP and CNV analysis. *BMC Genomics* **15**, 368 (2014).
4. Kaur, Y., de Souza, R.J., Gibson, W.T. & Meyre, D. A systematic review of genetic syndromes with obesity. *Obes Rev* (2017).
5. McKusick-Nathans Institute of Genetic Medicine, J.H.U.B., MD). Online Mendelian Inheritance in Man, OMIM®. (2016).
6. Rudd, M.K. *et al.* Segmental duplications mediate novel, clinically relevant chromosome rearrangements. *Hum Mol Genet* **18**, 2957-62 (2009).
7. Coe, B.P. *et al.* Refining analyses of copy number variation identifies specific genes associated with developmental delay. *Nat Genet* **46**, 1063-71 (2014).
8. Hladilkova, E. *et al.* A recurrent deletion on chromosome 2q13 is associated with developmental delay and mild facial dysmorphisms. *Mol Cytogenet* **8**, 57 (2015).
9. Burnside, R.D. *et al.* Microdeletion/microduplication of proximal 15q11.2 between BP1 and BP2: a susceptibility region for neurological dysfunction including developmental and language delay. *Hum Genet* **130**, 517-28 (2011).
10. Cox, D.M. & Butler, M.G. The 15q11.2 BP1-BP2 microdeletion syndrome: a review. *Int J Mol Sci* **16**, 4068-82 (2015).
11. Contribution of copy number variants to schizophrenia from a genome-wide study of 41,321 subjects. *Nat Genet* (2016).
12. McDonald-McGinn, D.M., Emanuel, B.S. & Zackai, E.H. 22q11.2 Deletion Syndrome. in *GeneReviews(R)* (eds Pagon, R.A. *et al.*) (Seattle (WA), 1993).
13. Robin, N.H. & Shprintzen, R.J. Defining the clinical spectrum of deletion 22q11.2. *J Pediatr* **147**, 90-6 (2005).
